# Supplementary material for: Additive-free reductive hydrodeoxygenation of fatty acids catalyzed by inexpensive simple nickel(ii) compounds
Source: Royal Society of Chemistry journal article supplement (doi:10.1039/d3nj01001e), 2023-01-01
Supplement: d3nj01001e1.pdf [file d3nj01001e1.pdf]

### *Supporting Information*

#### **Additive-free reductive hydrodeoxygenation of fatty acids catalyzed by inexpensive simple nickel (II) compounds.**

|                                                                                                                                                                                                                  |           |
|------------------------------------------------------------------------------------------------------------------------------------------------------------------------------------------------------------------|-----------|
| <b>Figure S1: Typical GC for crude reaction mix before hydrolysis of the reduction of PA with 3 eq. PhSiH<sub>3</sub>, 5 mol% of a Ni (II) compound as catalyst, neat conditions, at 90 °C for 16 hours.....</b> | <b>3</b>  |
| <b>Figure S2: MS for phenylsilane.....</b>                                                                                                                                                                       | <b>3</b>  |
| <b>Figure S3: MS for diphenylsilane.....</b>                                                                                                                                                                     | <b>4</b>  |
| <b>Figure S4: MS for n-pentadecane.....</b>                                                                                                                                                                      | <b>4</b>  |
| <b>Figure S5: MS for 1,3-diphenyldisiloxane.....</b>                                                                                                                                                             | <b>5</b>  |
| <b>Figure S6: MS for n-hexadecane.....</b>                                                                                                                                                                       | <b>5</b>  |
| <b>Figure S7: MS for hexadecanal.....</b>                                                                                                                                                                        | <b>6</b>  |
| <b>Figure S8: MS for 1-hexadecanol.....</b>                                                                                                                                                                      | <b>6</b>  |
| <b>Figure S9: MS for PA.....</b>                                                                                                                                                                                 | <b>7</b>  |
| <b>Figure S10: MS for triphenylsilane.....</b>                                                                                                                                                                   | <b>7</b>  |
| <b>Figure S11: MS for 1-phenylhexadecane.....</b>                                                                                                                                                                | <b>8</b>  |
| <b>Figure S12: MS for 1-hexadecoxyphenylsilane.....</b>                                                                                                                                                          | <b>8</b>  |
| <b>Figure S13: MS for dihexadecylether.....</b>                                                                                                                                                                  | <b>9</b>  |
| <b>Figure S14: MS for cetyl palmitate.....</b>                                                                                                                                                                   | <b>9</b>  |
| <b>Figure S15: Chromatogram of the optimization reaction using benzonitrile as solvent, 4 eq. PhSiH<sub>3</sub>, 5 mol% Ni(AcO)<sub>2</sub>, at 90 °C for 16 hours.....</b>                                      | <b>10</b> |
| <b>Figure S16: MS for N-benzylidenebenzylamine.....</b>                                                                                                                                                          | <b>10</b> |
| <b>Figure S17: MS for N-benzylacetamide.....</b>                                                                                                                                                                 | <b>11</b> |
| <b>Figure S18: MS for N,N-dibenzyl-N-(1-hydroxyethyl)amine.....</b>                                                                                                                                              | <b>11</b> |
| <b>Figure S19: Chromatogram of the reduction of PA before hydrolysis with 4.5 eq. of TMDS and 5 mol% of Ni(AcO)<sub>2</sub> · 4 H<sub>2</sub>O under neat conditions at 90 °C for 16 hours.....</b>              | <b>12</b> |
| <b>Figure S20: MS for 1-hexadecoxy-1,1,3,3-tetramethyldisiloxane.....</b>                                                                                                                                        | <b>12</b> |
| <b>Figure S21: MS for 1,1,3,3-tetramethylsilyl palmitate.....</b>                                                                                                                                                | <b>13</b> |
| <b>Figure S22: MS for 1-hexadecoxy-1,1,3,3,5,5-hexamethyltrisiloxane.....</b>                                                                                                                                    | <b>13</b> |
| <b>Figure S23: MS for 1-hexadecoxy-1,1,3,3,5,5,7,7-octamethyltetrasiloxane.....</b>                                                                                                                              | <b>14</b> |
| <b>Figure S24: MS for 1-hexadecoxy-1,1,3,3,5,5,7,7,9,9-decamethylpentasiloxane.....</b>                                                                                                                          | <b>14</b> |

|                                                                                                                                                                                                                                            |           |
|--------------------------------------------------------------------------------------------------------------------------------------------------------------------------------------------------------------------------------------------|-----------|
| <b>Figure S25: Chromatogram for the reaction of PA before hydrolysis with 3 eq. of Et<sub>3</sub>SiH, 5 mol% Ni(AcO)<sub>2</sub> · 4 H<sub>2</sub>O, neat conditions at 90 °C for 16 hours.....</b>                                        | <b>15</b> |
| <b>Figure S26: MS for triethylsilyl palmitate.....</b>                                                                                                                                                                                     | <b>15</b> |
| <b>Figure S27: Chromatogram of the reduction of PA with 3 eq. of PhSiH<sub>3</sub> and 5 mol% Ni(AcO)<sub>2</sub> · 4 H<sub>2</sub>O and TEMPO as radical trap, under neat conditions at 90 °C for 16 hours. ....</b>                      | <b>16</b> |
| <b>Figure S28: MS for 2,2,6,6-tetramethylpiperidine. ....</b>                                                                                                                                                                              | <b>16</b> |
| <b>Figure S29: MS for 2,2,6,6-tetramethyl-1-piperidinyloxy (TEMPO). ....</b>                                                                                                                                                               | <b>17</b> |
| <b>Figure S30: Chromatogram for crude reaction mix before hydrolysis of the reduction of SA with 3 eq. PhSiH<sub>3</sub>, 5 mol% of a Ni(AcO)<sub>2</sub> · 4 H<sub>2</sub>O as catalyst, neat conditions, at 90 °C for 16 hours.....</b>  | <b>17</b> |
| <b>Figure S31: MS for n-heptadecane. ....</b>                                                                                                                                                                                              | <b>18</b> |
| <b>Figure S32: MS for n-octadecane.....</b>                                                                                                                                                                                                | <b>18</b> |
| <b>Figure S33: MS for octadecanal. ....</b>                                                                                                                                                                                                | <b>19</b> |
| <b>Figure S34: MS for 1-octadecanol.....</b>                                                                                                                                                                                               | <b>19</b> |
| <b>Figure S35: MS for 1-phenylhexadecane.....</b>                                                                                                                                                                                          | <b>20</b> |
| <b>Figure S36: MS for 1-hexadecoxyphenylsilane. ....</b>                                                                                                                                                                                   | <b>20</b> |
| <b>Figure S37: Chromatogram for crude reaction mix before hydrolysis of the reduction of OA with 3 eq. PhSiH<sub>3</sub>, 5 mol% of a Ni(AcO)<sub>2</sub> · 4 H<sub>2</sub>O as catalyst, neat conditions, at 90 °C for 16 hours. ....</b> | <b>21</b> |
| <b>Figure S38: MS for (E/Z)-8-heptadecadecene.....</b>                                                                                                                                                                                     | <b>21</b> |
| <b>Figure S39: MS for (E/Z)-9-octadecene.....</b>                                                                                                                                                                                          | <b>22</b> |
| <b>Figure S40: MS for (E/Z)-9-octadecenal.....</b>                                                                                                                                                                                         | <b>22</b> |
| <b>Figure S41: MS for (E/Z)-9-octadecen-1-ol.....</b>                                                                                                                                                                                      | <b>23</b> |
| <b>Figure S42: MS for (E/Z)-9-octadecenoic acid.....</b>                                                                                                                                                                                   | <b>23</b> |
| <b>Figure S43: MS for 1-phenyl-(E/Z)-9-octadecene.....</b>                                                                                                                                                                                 | <b>24</b> |
| <b>Figure S44: MS for (E/Z)-9-octadecenoxyphenylsilane. ....</b>                                                                                                                                                                           | <b>24</b> |
| <b>Figure S45: FTIR-ATR spectra of [Ni(C<sub>15</sub>H<sub>31</sub>COO)<sub>2</sub>(H<sub>2</sub>O)<sub>2</sub>].....</b>                                                                                                                  | <b>25</b> |
| <b>Figure S46: UV-Vis-NIR spectra of [Ni(C<sub>15</sub>H<sub>31</sub>COO)<sub>2</sub>(H<sub>2</sub>O)<sub>2</sub>].....</b>                                                                                                                | <b>25</b> |
| <b>Figure S47: DART<sup>+</sup>-MS of the synthesized [Ni(C<sub>15</sub>H<sub>31</sub>COO)<sub>2</sub>(H<sub>2</sub>O)<sub>2</sub>]. ....</b>                                                                                              | <b>26</b> |
| <b>Figure S48: FAB<sup>+</sup>-MS for the synthesized [Ni(C<sub>15</sub>H<sub>31</sub>COO)<sub>2</sub>(H<sub>2</sub>O)<sub>2</sub>].....</b>                                                                                               | <b>27</b> |

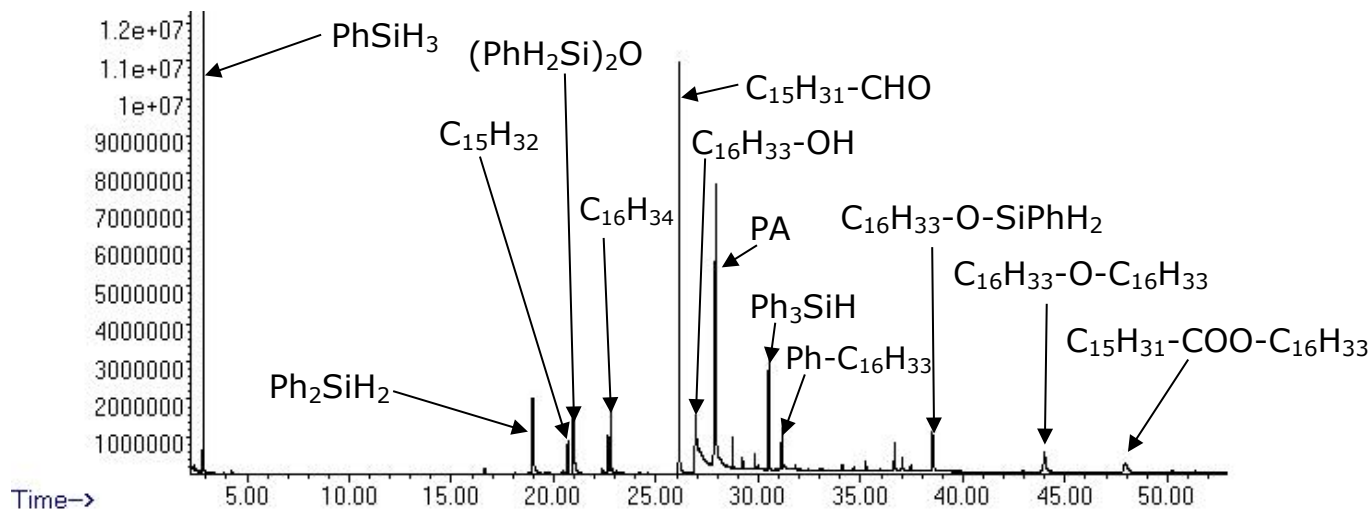

**Figure S1:** Typical GC for crude reaction mix before hydrolysis of the reduction of PA with 3 eq. PhSiH<sub>3</sub>, 5 mol% of a Ni (II) compound as catalyst, neat conditions, at 90 °C for 16 hours.

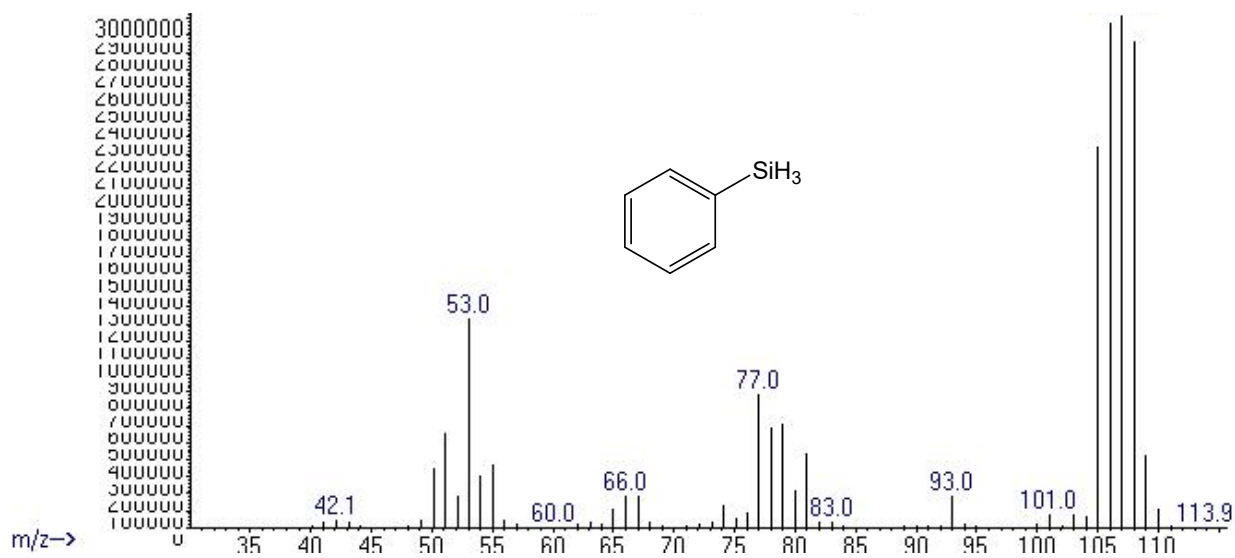

**Figure S2:** MS for phenylsilane.

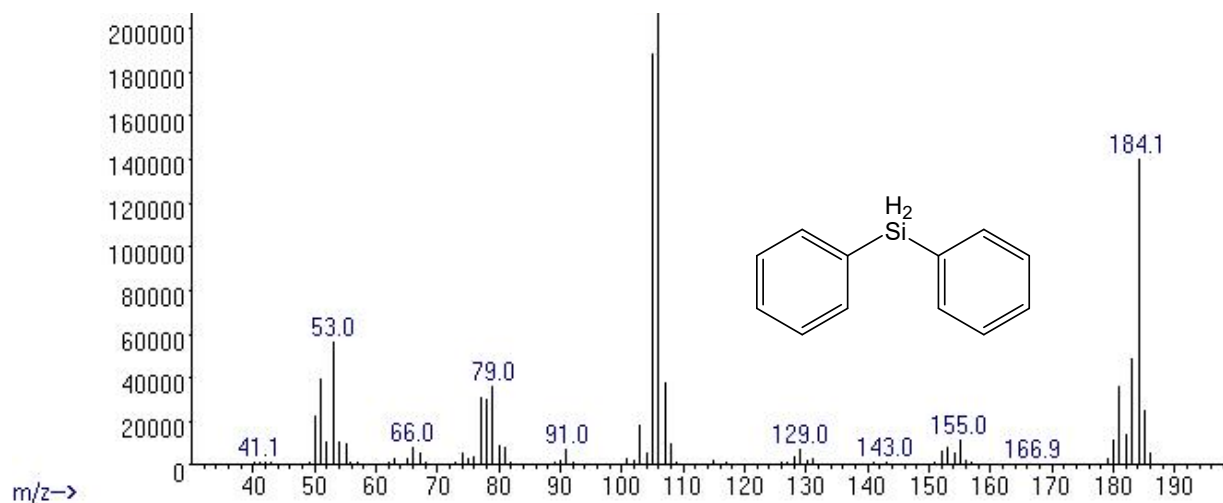

**Figure S3:** MS for diphenylsilane.

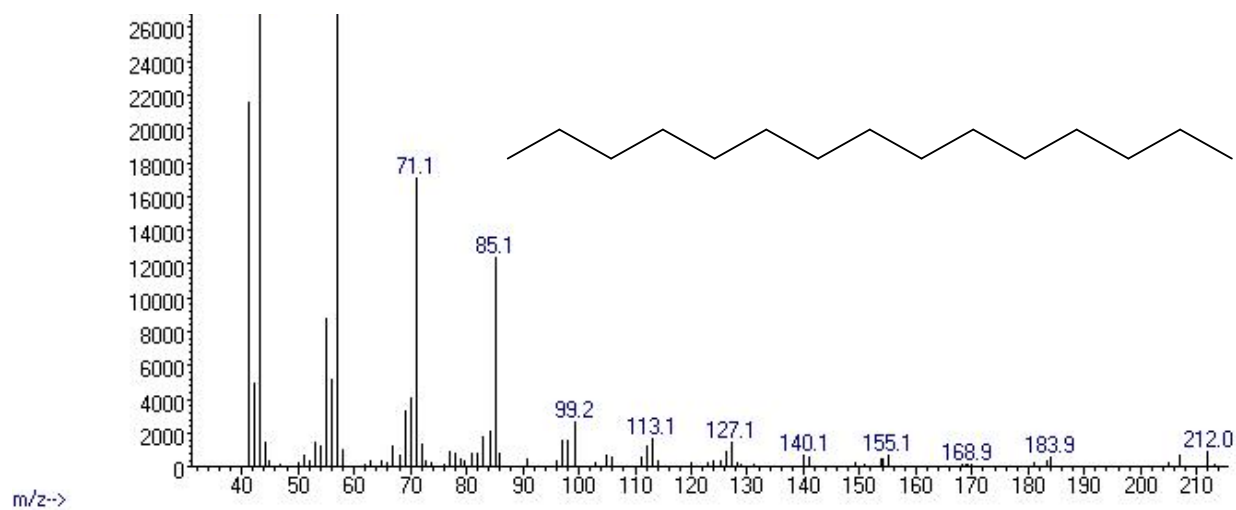

**Figure S4:** MS for n-pentadecane.

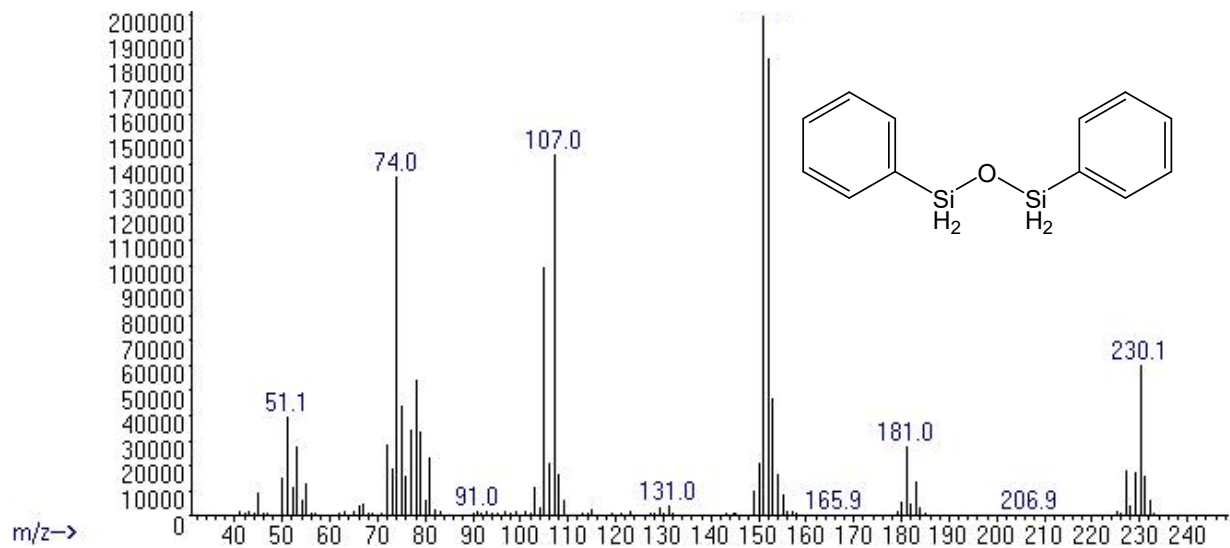

**Figure S5:** MS for 1,3-diphenyldisiloxane.

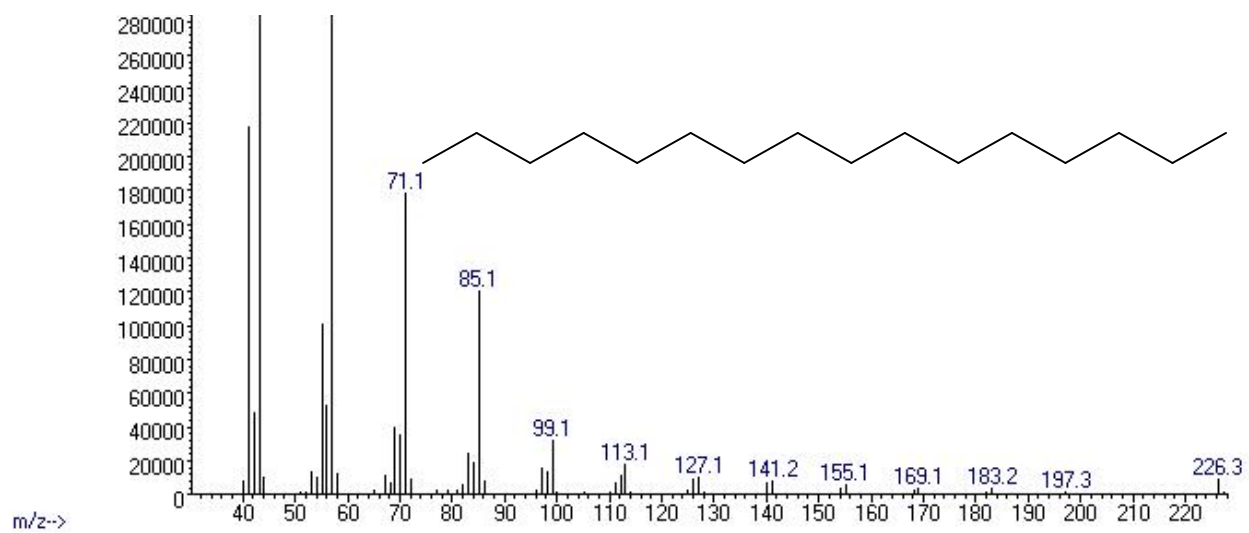

**Figure S6:** MS for n-hexadecane.

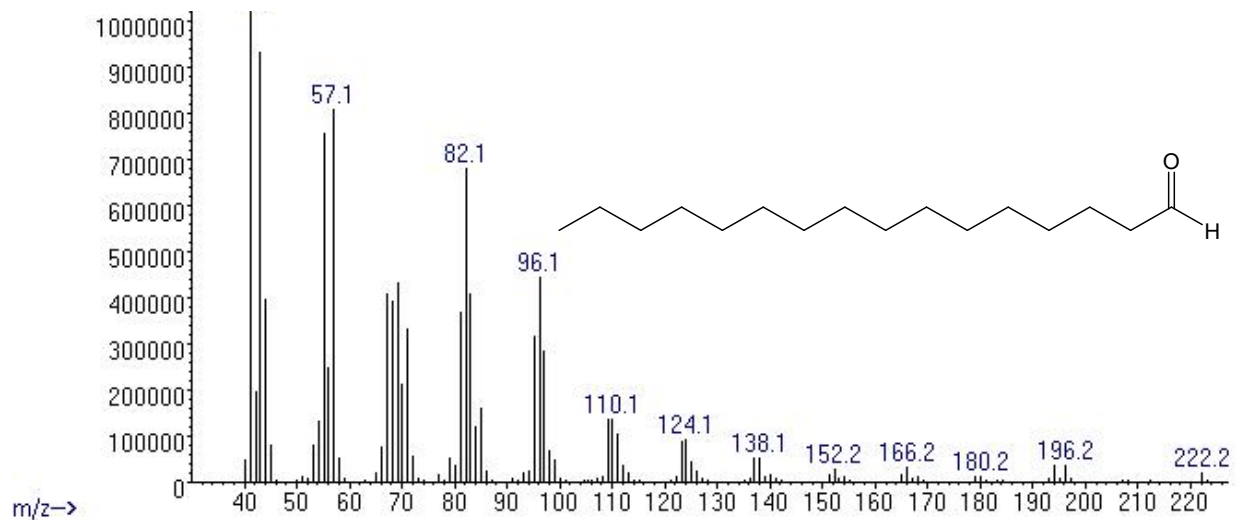

**Figure S7:** MS for hexadecanal.

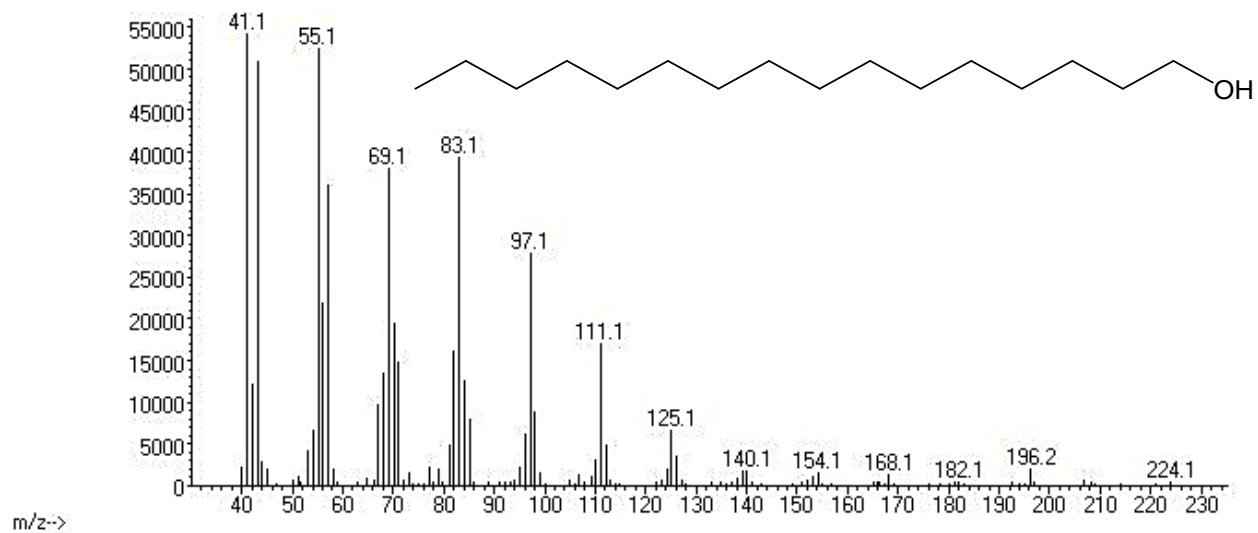

**Figure S8:** MS for 1-hexadecanol.

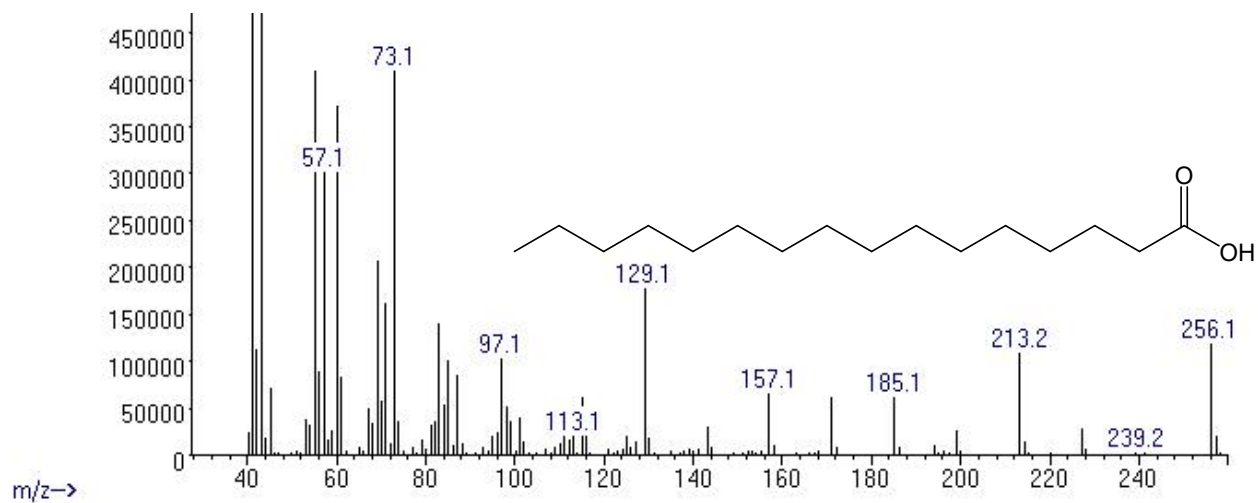

**Figure S9:** MS for PA.

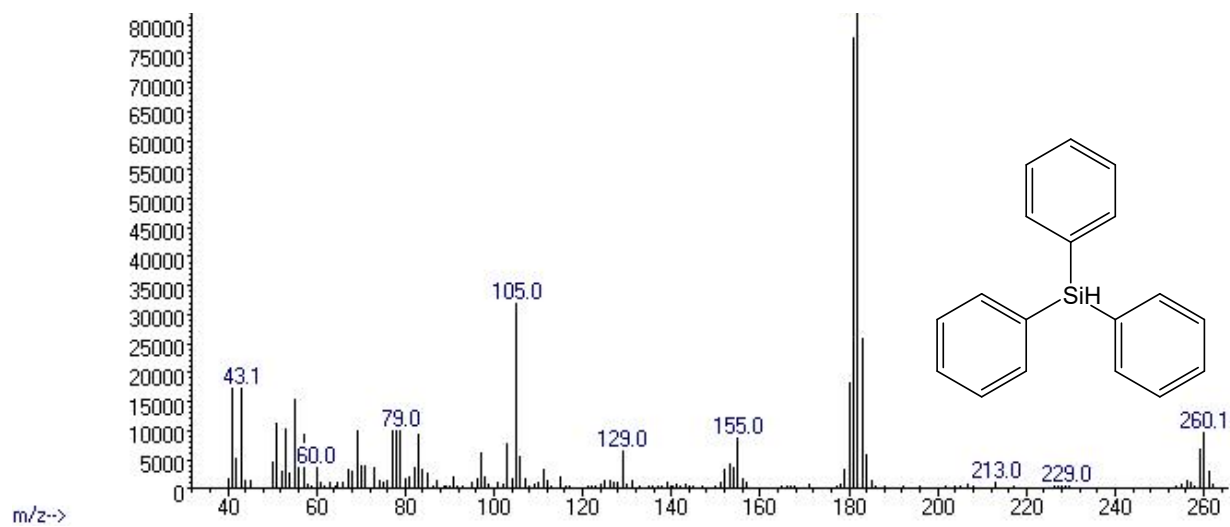

**Figure S10:** MS for triphenylsilane.

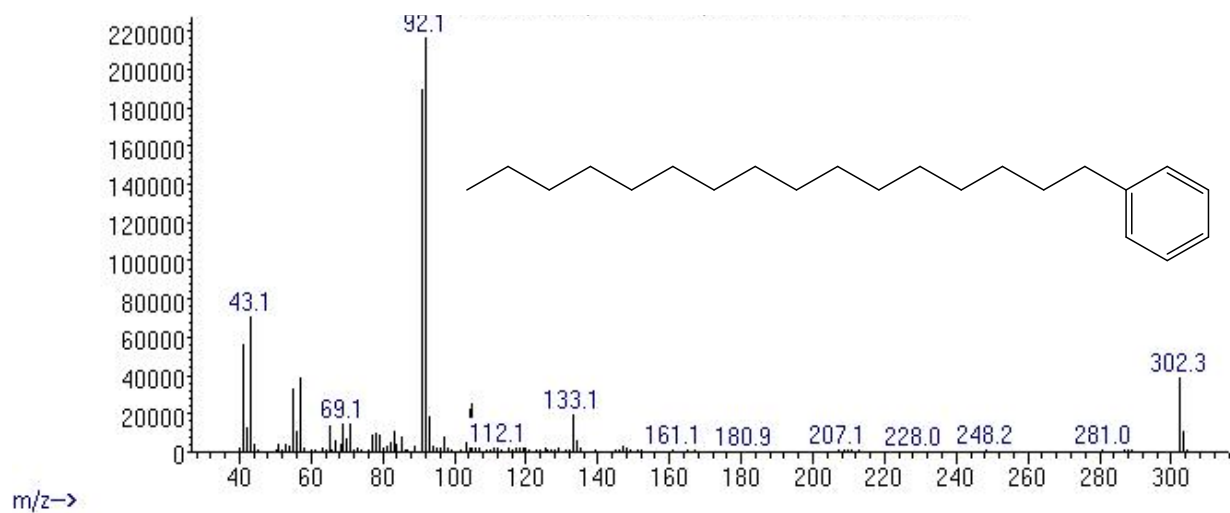

**Figure S11:** MS for 1-phenylhexadecane.

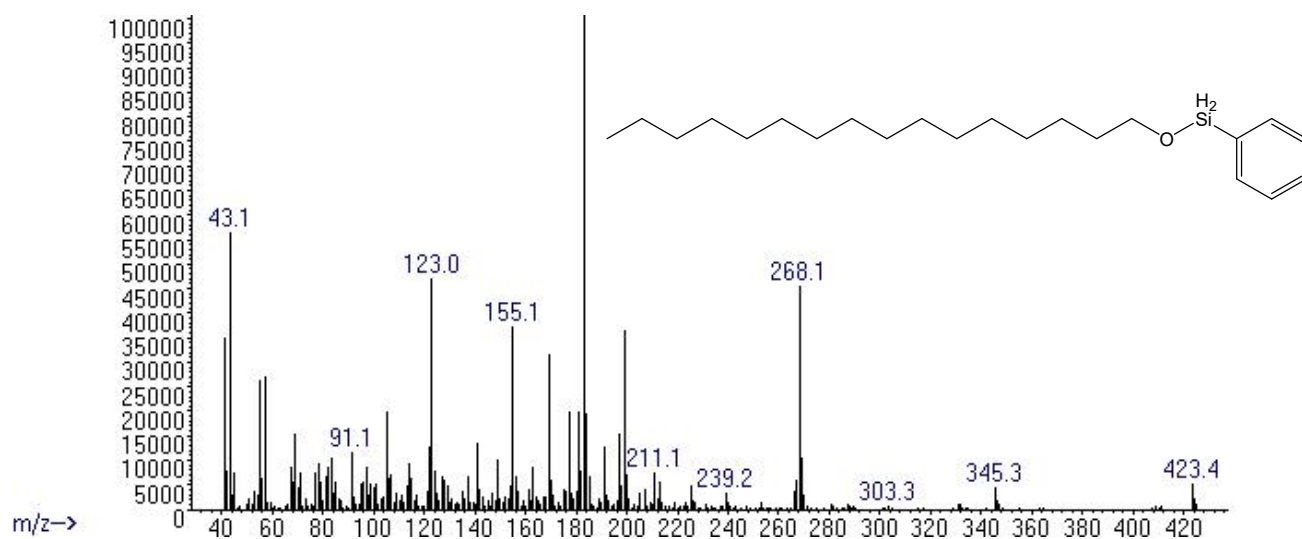

**Figure S12:** MS for 1-hexadecoxyphenylsilane.



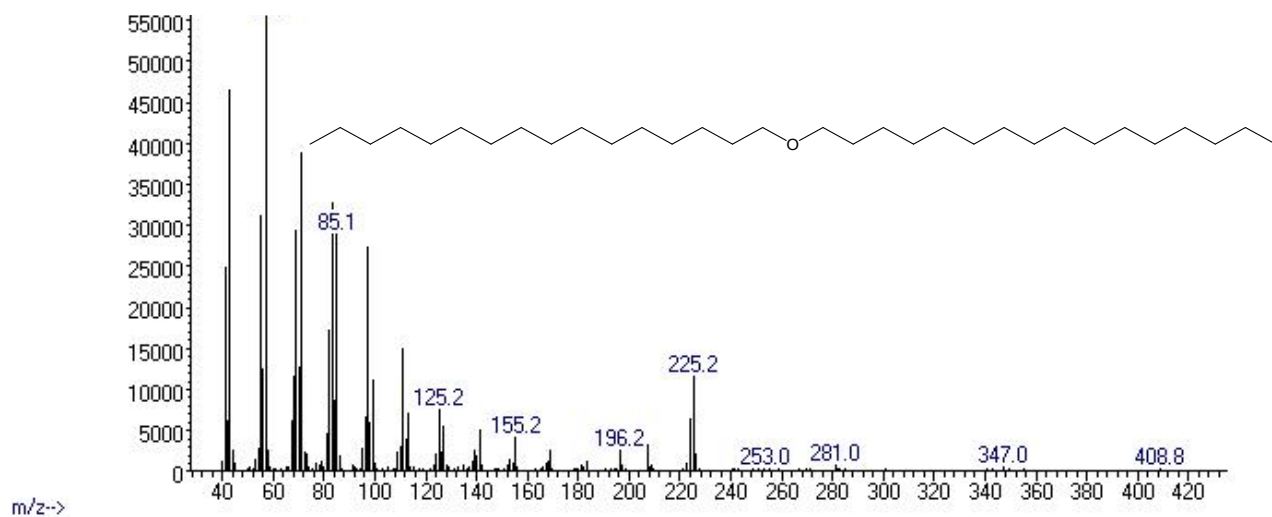

**Figure S13:** MS for dihexadecylether.

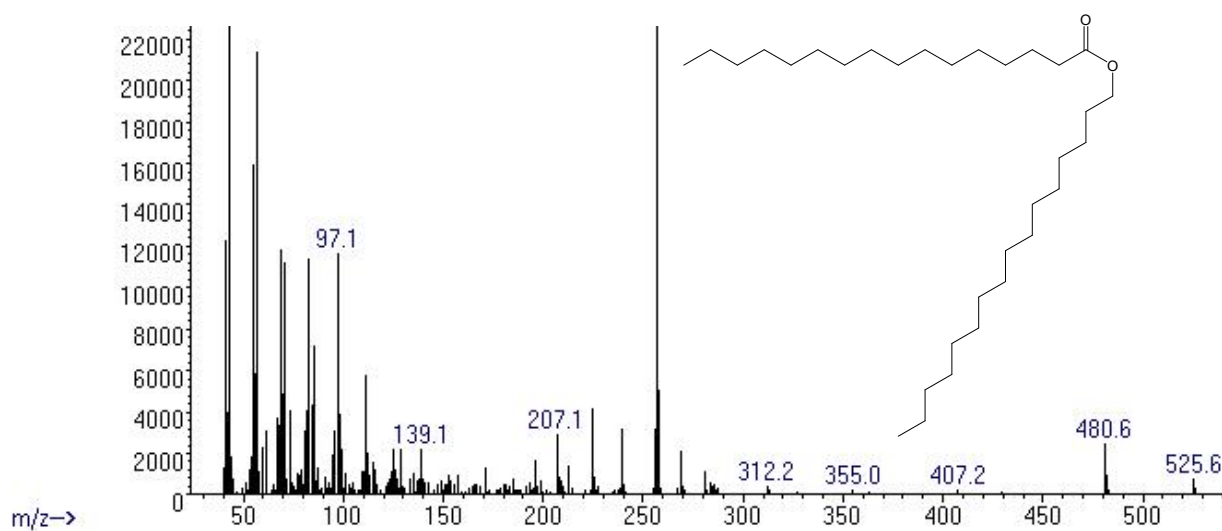

**Figure S14:** MS for cetyl palmitate.

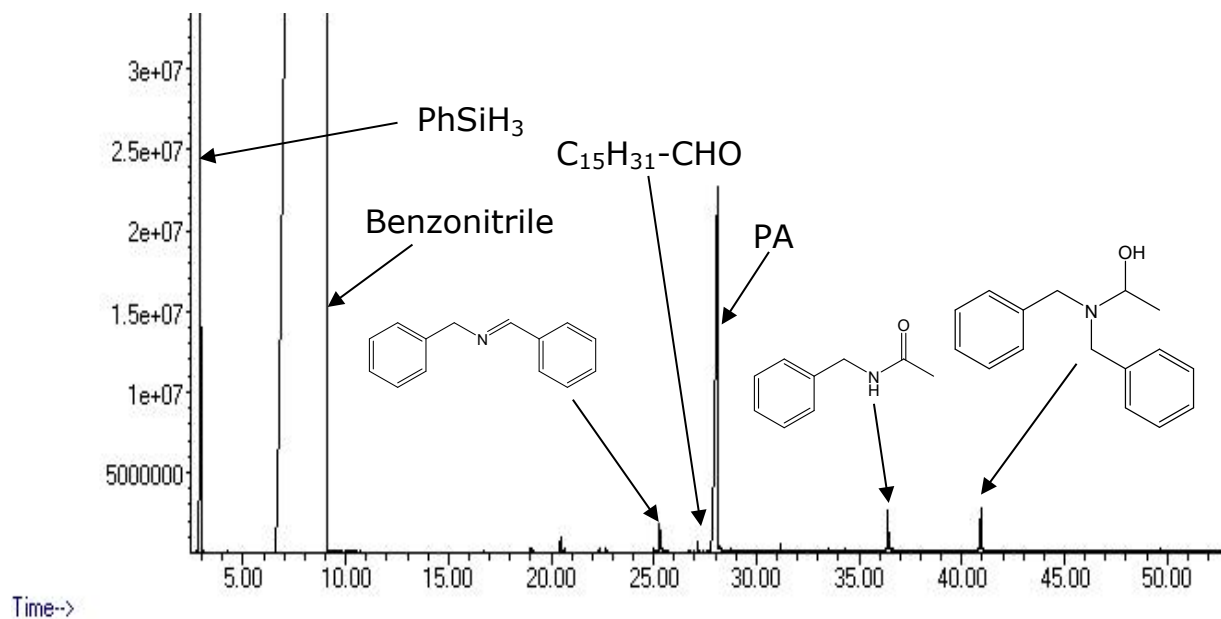

**Figure S15:** Chromatogram of the optimization reaction using benzonitrile as solvent, 4 eq.  $\text{PhSiH}_3$ , 5 mol%  $\text{Ni}(\text{AcO})_2$ , at 90 °C for 16 hours.

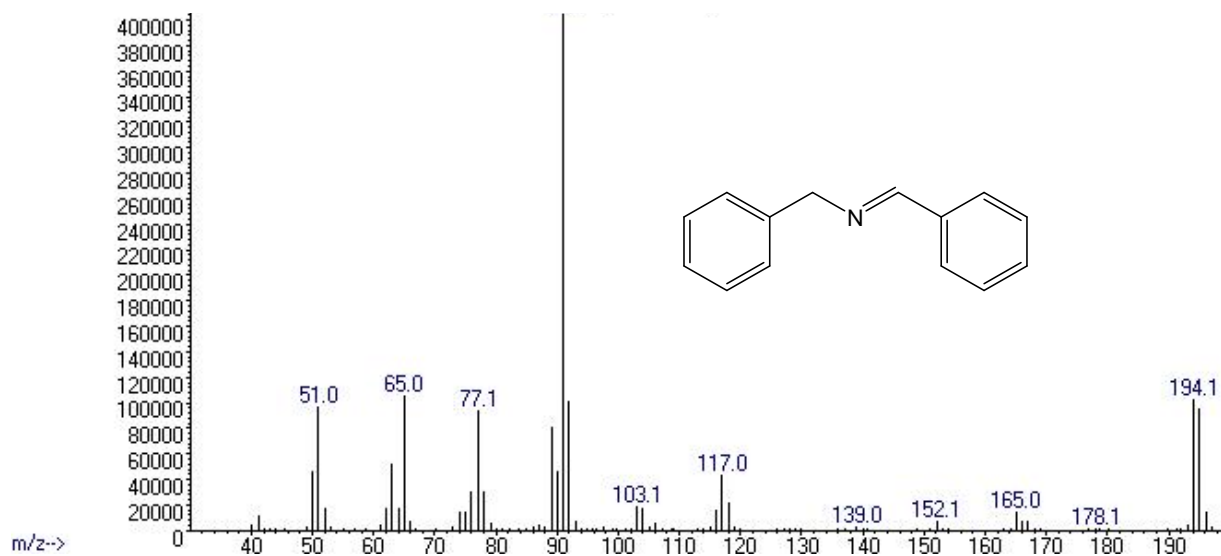

**Figure S16:** MS for N-benzylidenebenzylamine.

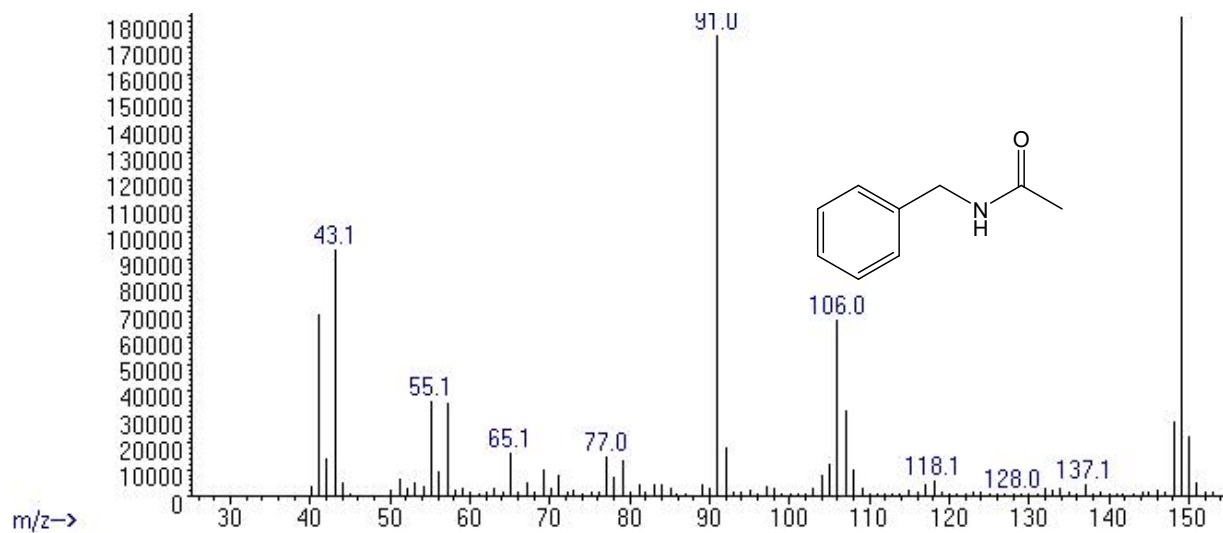

**Figure S17:** MS for N-benzylacetamide.

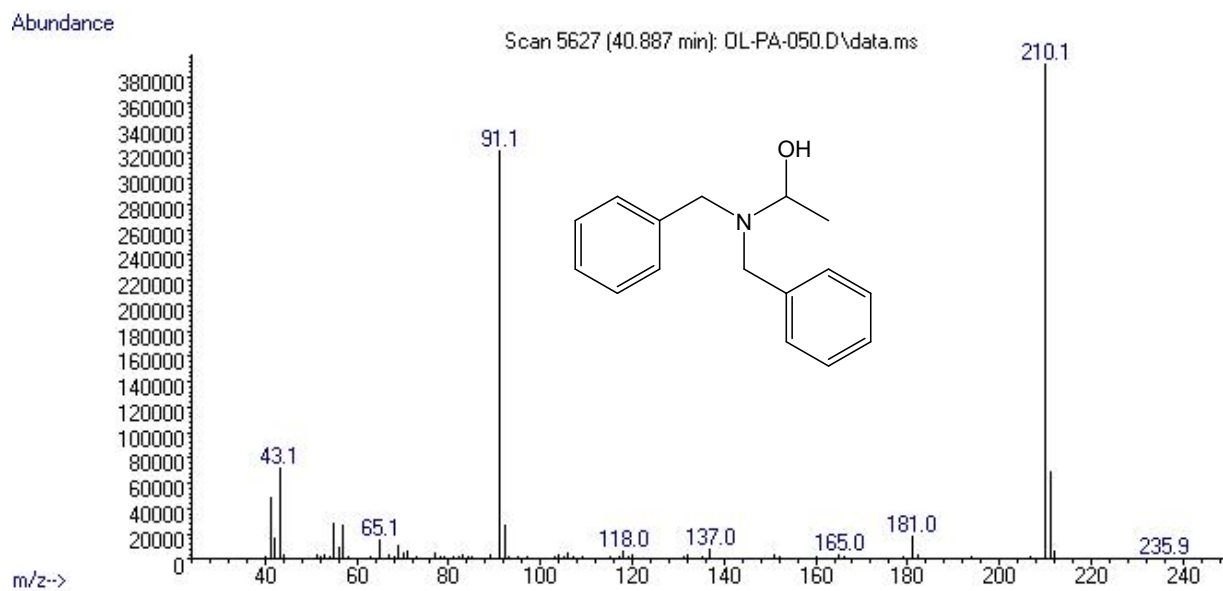

**Figure S18:** MS for N,N-dibenzyl-N-(1-hydroxyethyl)amine.

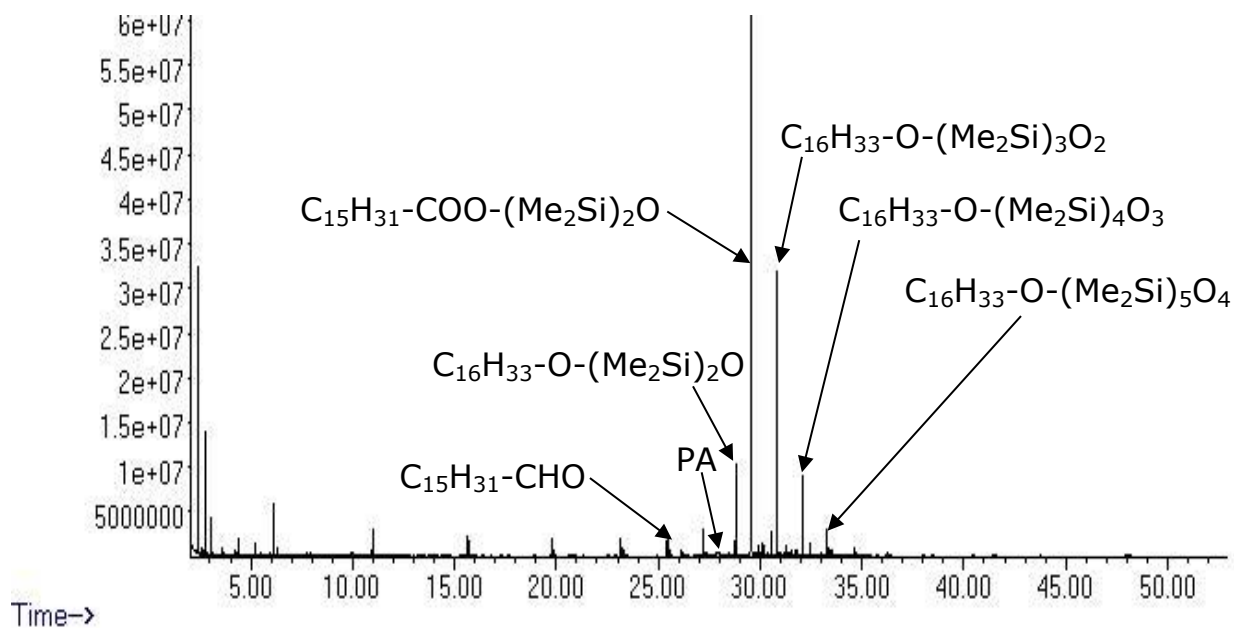

**Figure S19:** Chromatogram of the reduction of PA before hydrolysis with 4.5 eq. of TMDMS and 5 mol% of Ni(AcO)<sub>2</sub> · 4 H<sub>2</sub>O under neat conditions at 90 °C for 16 hours.

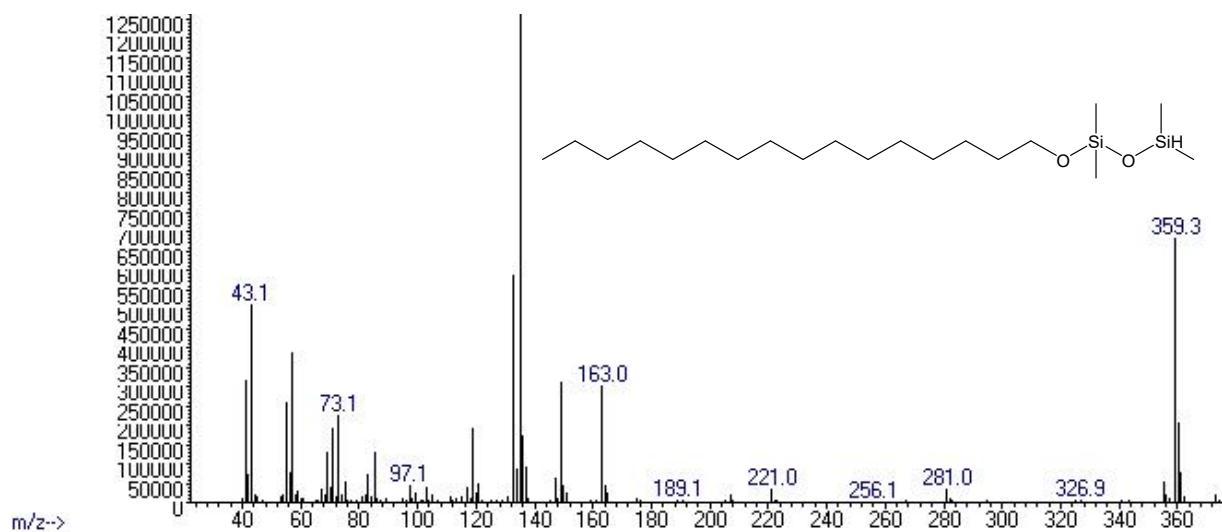

**Figure S20:** MS for 1-hexadecoxy-1,1,3,3-tetramethyldisiloxane.

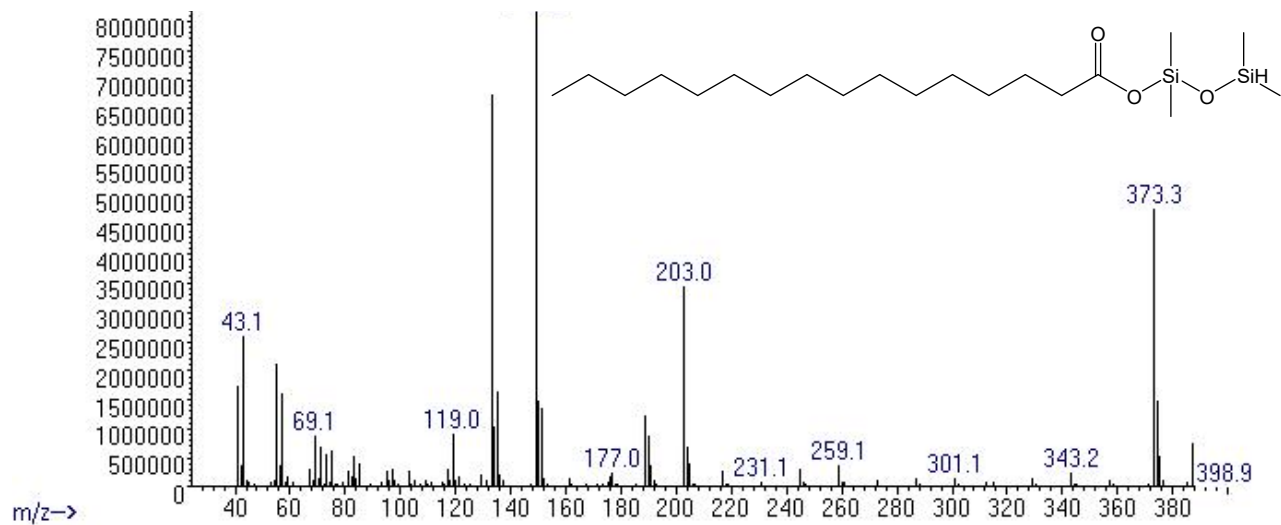

**Figure S21:** MS for 1,1,3,3-tetramethylsilyl palmitate.

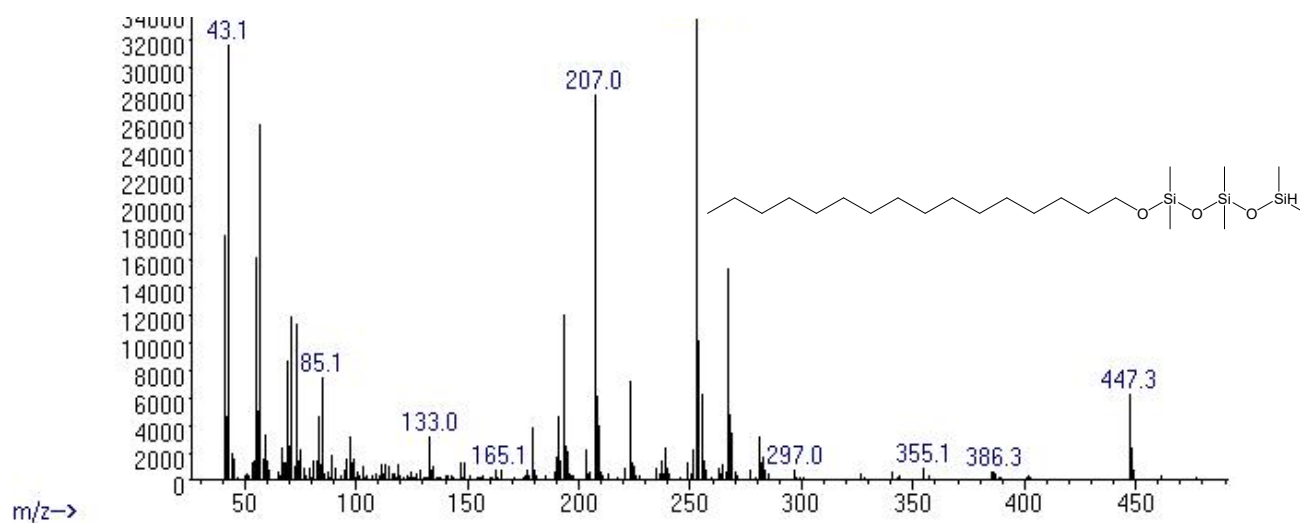

**Figure S22:** MS for 1-hexadecoxy-1,1,3,3,5,5-hexamethyltrisiloxane.

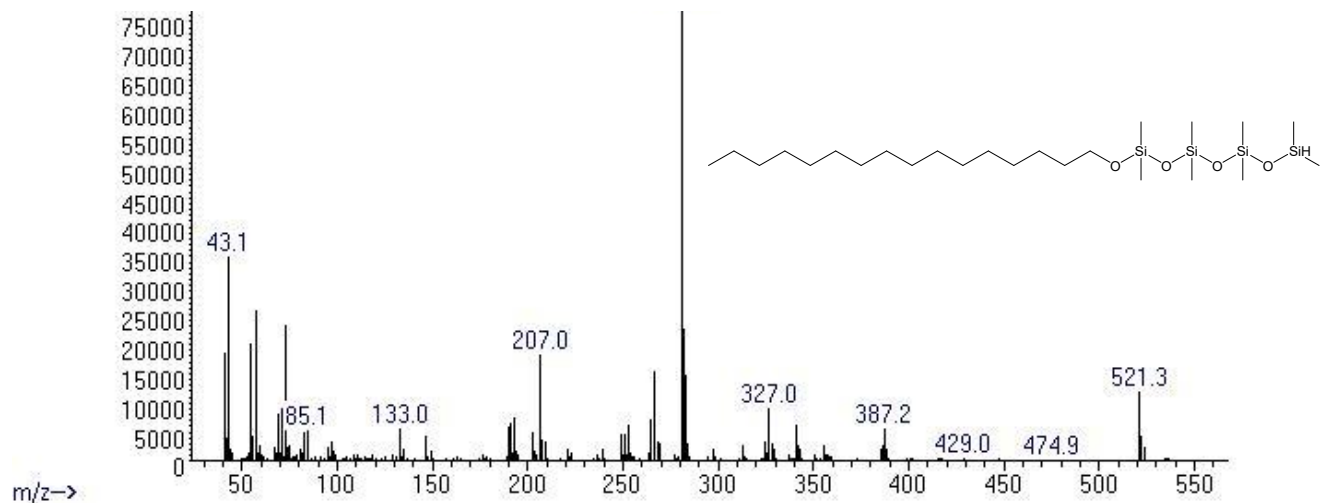

**Figure S23:** MS for 1-hexadecoxy-1,1,3,3,5,5,7,7-octamethyltetrasiloxane.

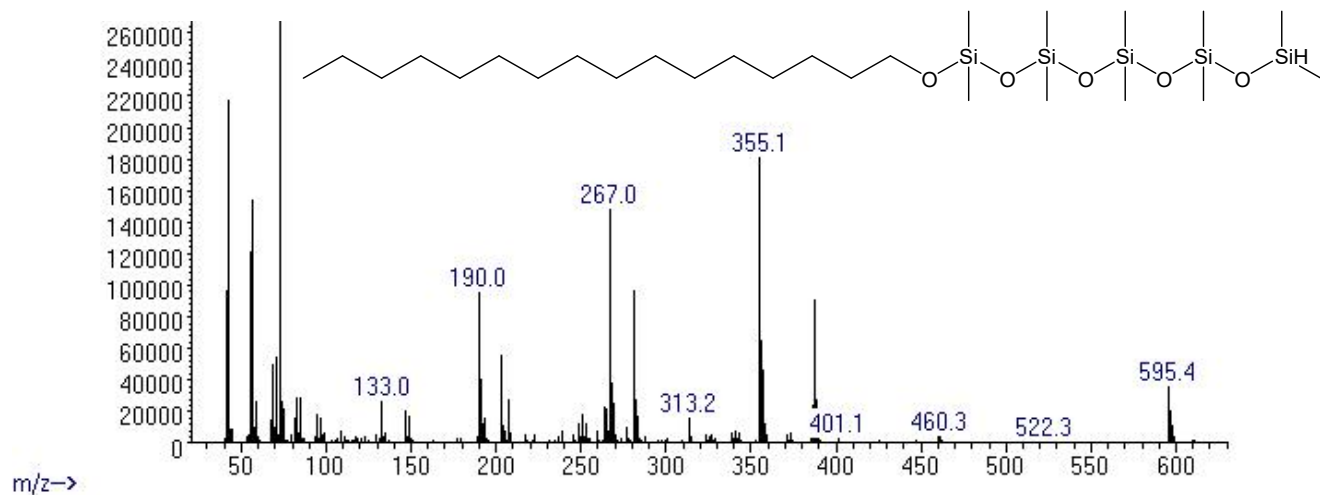

**Figure S24:** MS for 1-hexadecoxy-1,1,3,3,5,5,7,7,9,9-decamethylpentasiloxane.

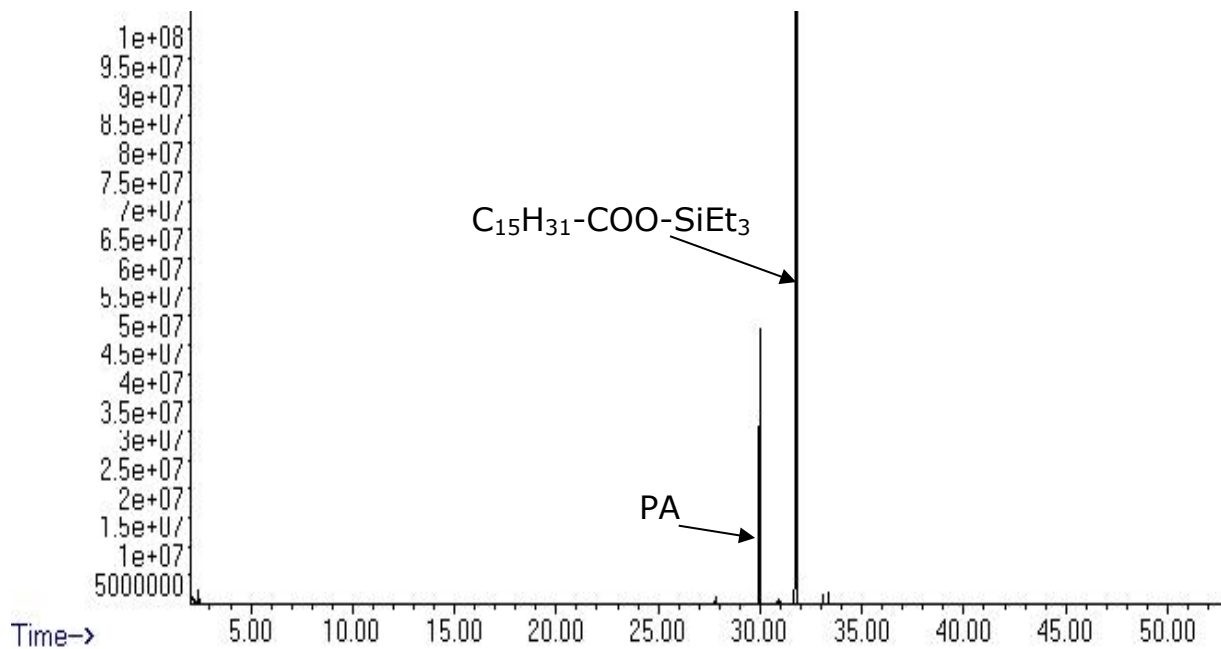

**Figure S25:** Chromatogram for the reaction of PA before hydrolysis with 3 eq. of Et<sub>3</sub>SiH, 5 mol% Ni(AcO)<sub>2</sub> · 4 H<sub>2</sub>O, neat conditions at 90 °C for 16 hours.

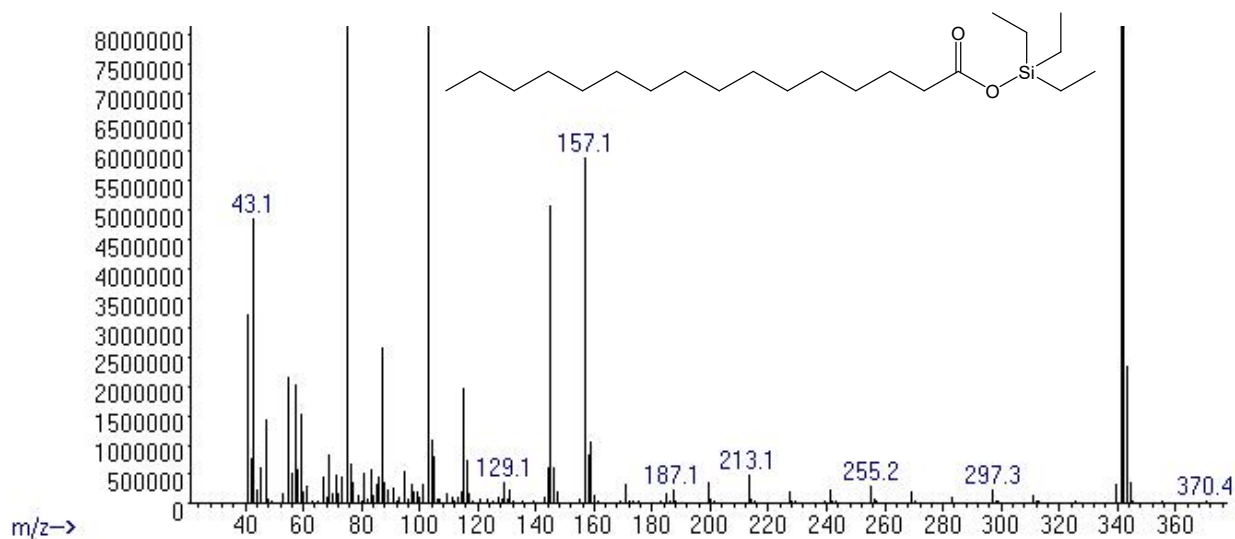

**Figure S26:** MS for triethylsilyl palmitate.

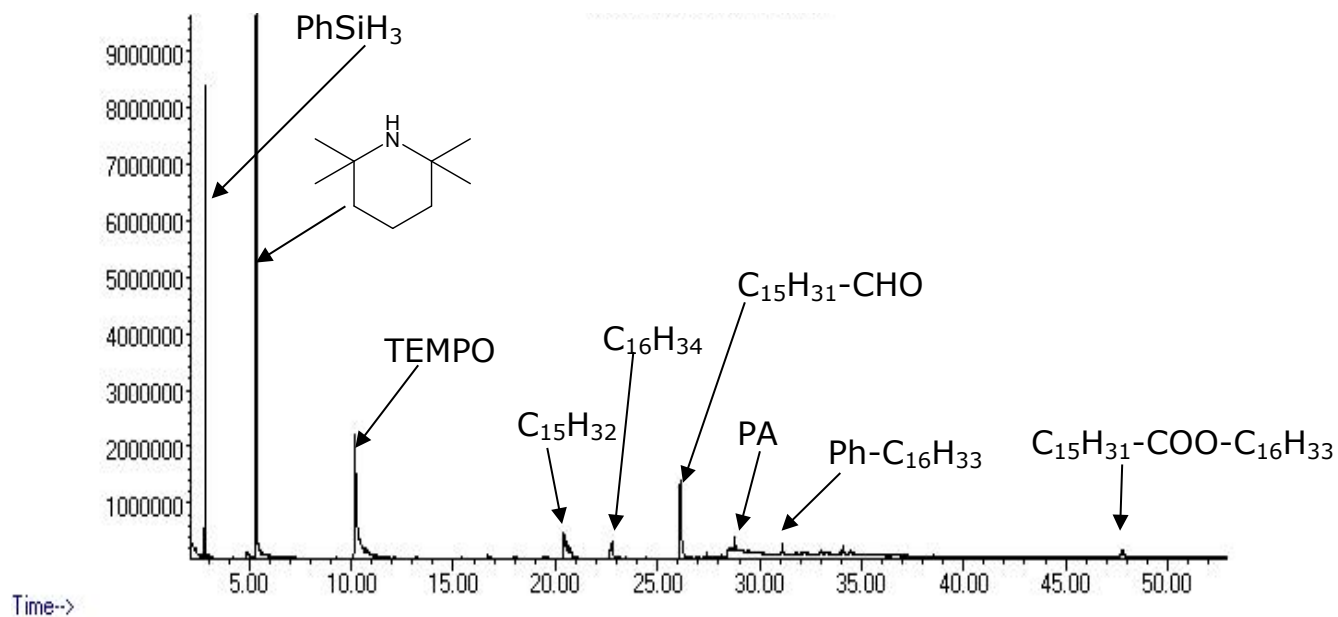

**Figure S27:** Chromatogram of the reduction of PA with 3 eq. of PhSiH<sub>3</sub> and 5 mol% Ni(AcO)<sub>2</sub> · 4 H<sub>2</sub>O and TEMPO as radical trap, under neat conditions at 90 °C for 16 hours.

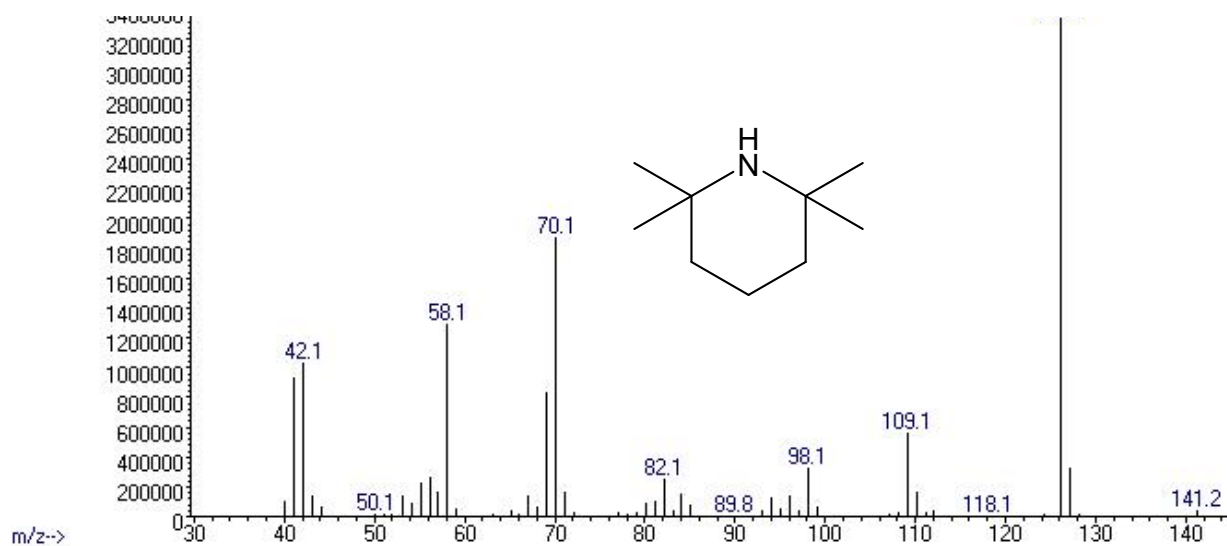

**Figure S28:** MS for 2,2,6,6-tetramethylpiperidine.



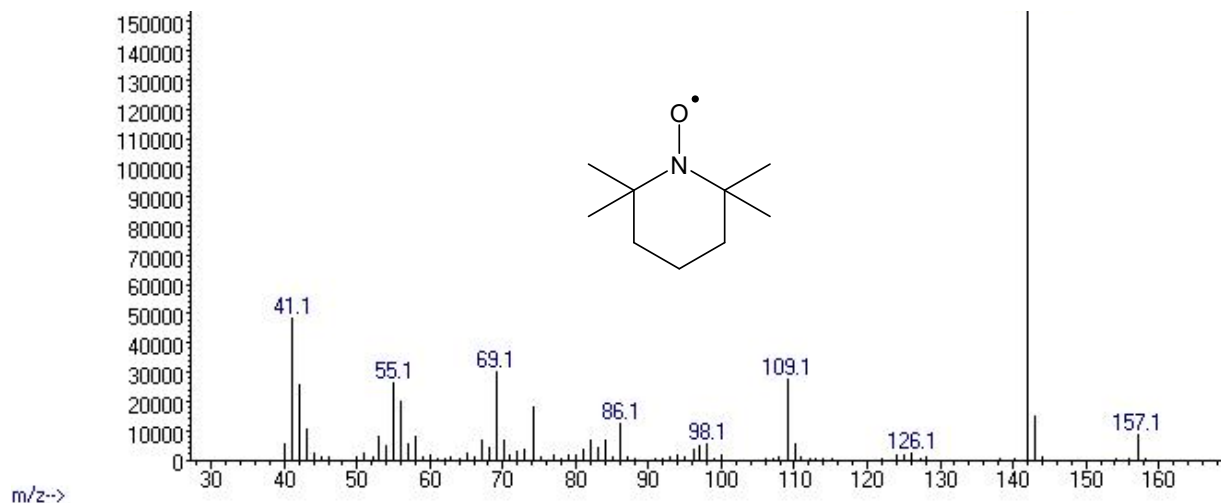

**Figure S29:** MS for 2,2,6,6-tetramethyl-1-piperidinyloxy (TEMPO).

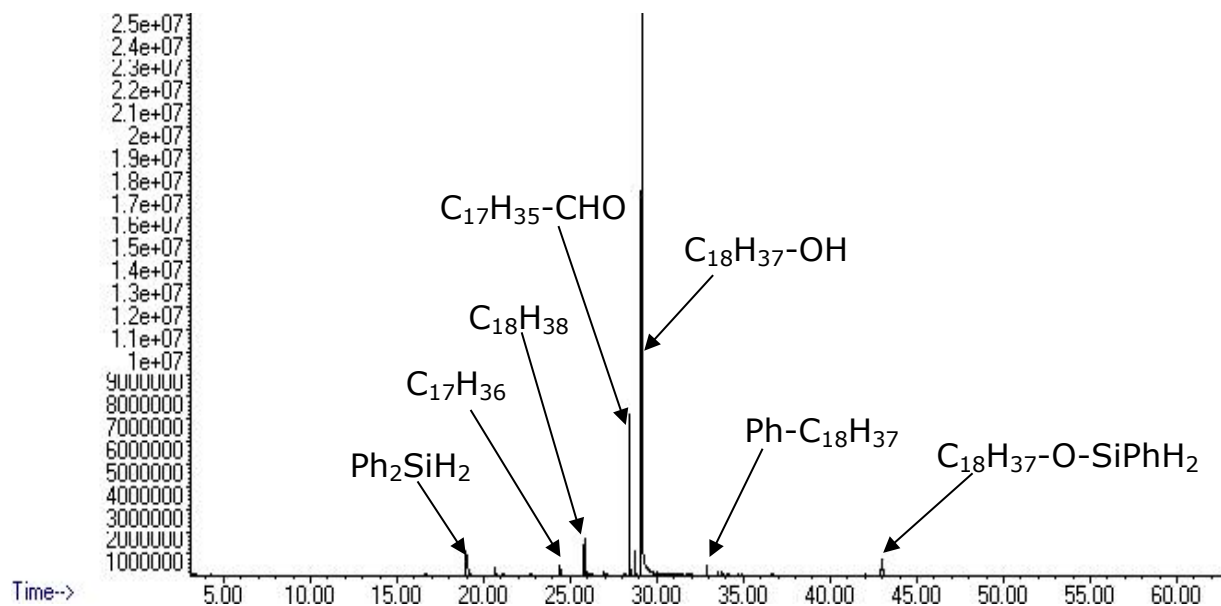

**Figure S30:** Chromatogram for crude reaction mix before hydrolysis of the reduction of SA with 3 eq. PhSiH<sub>3</sub>, 5 mol% of a Ni(AcO)<sub>2</sub> · 4 H<sub>2</sub>O as catalyst, neat conditions, at 90 °C for 16 hours.

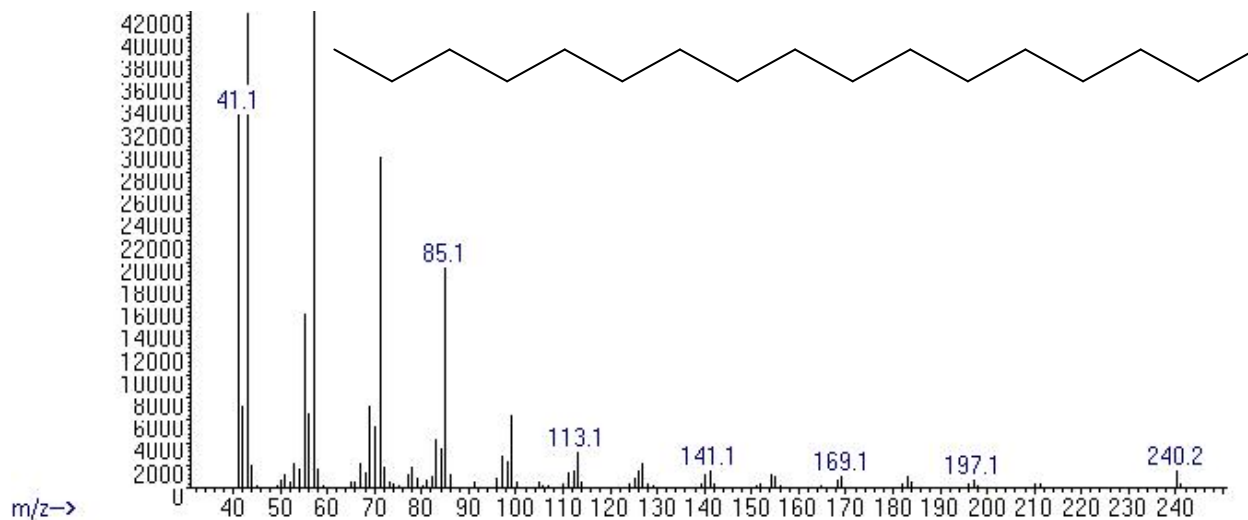

**Figure S31:** MS for n-heptadecane.

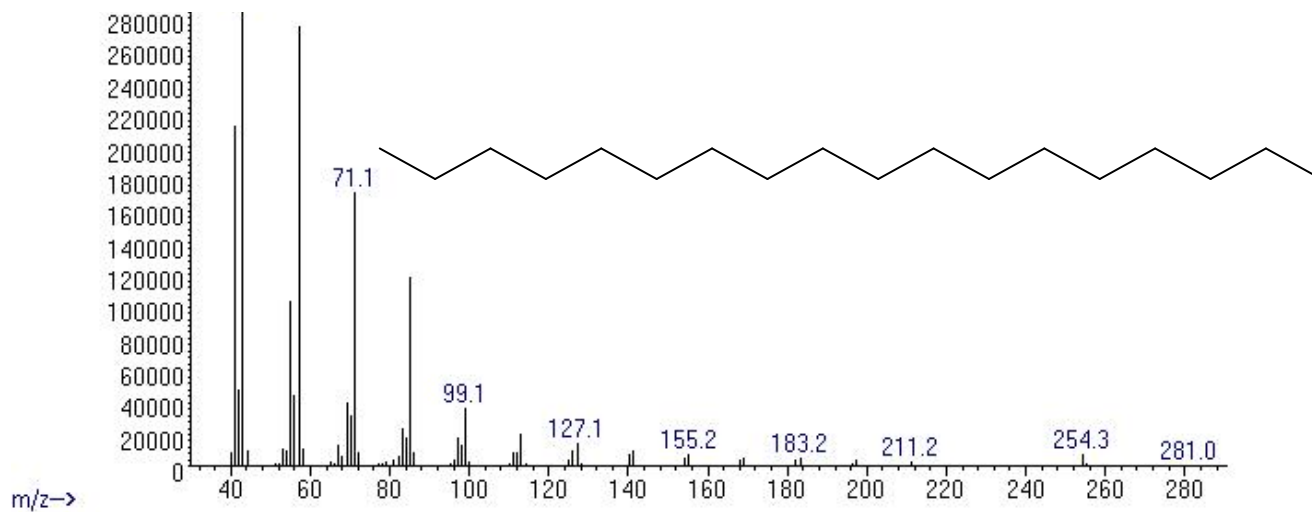

**Figure S32:** MS for n-octadecane.

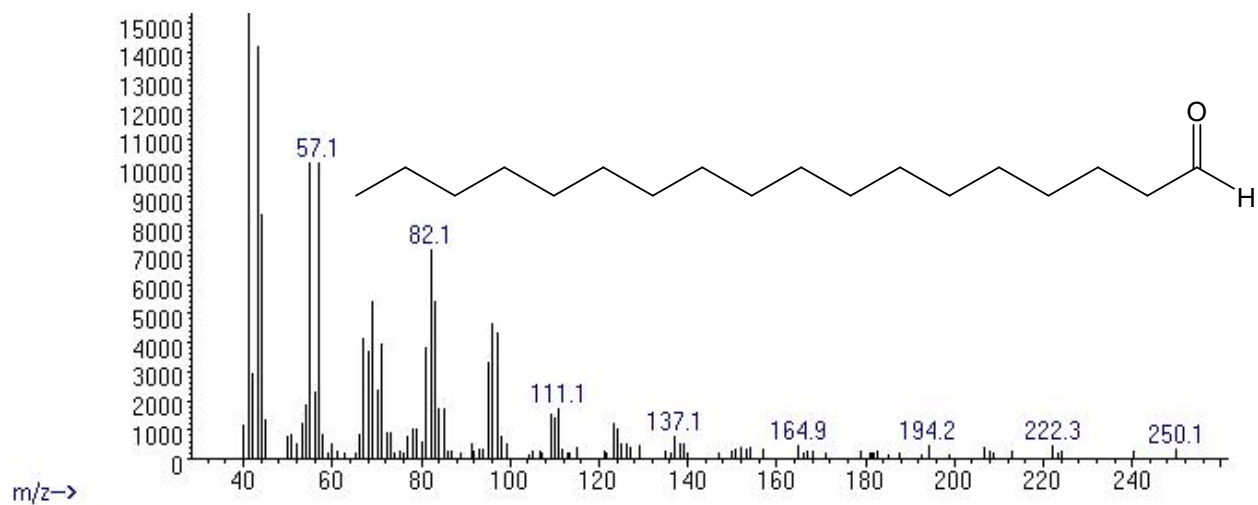

**Figure S33:** MS for octadecanal.

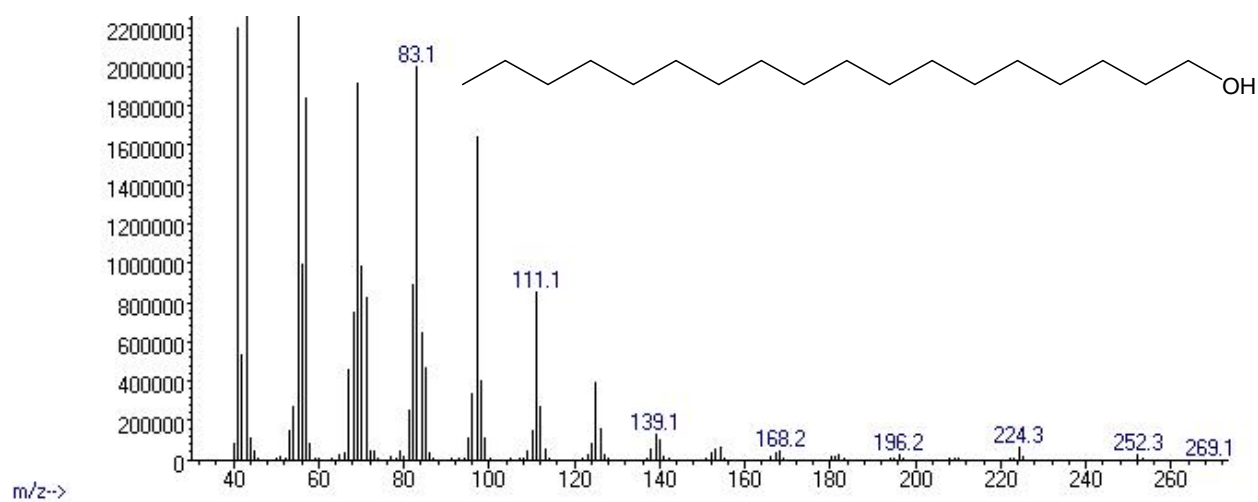

**Figure S34:** MS for 1-octadecanol.

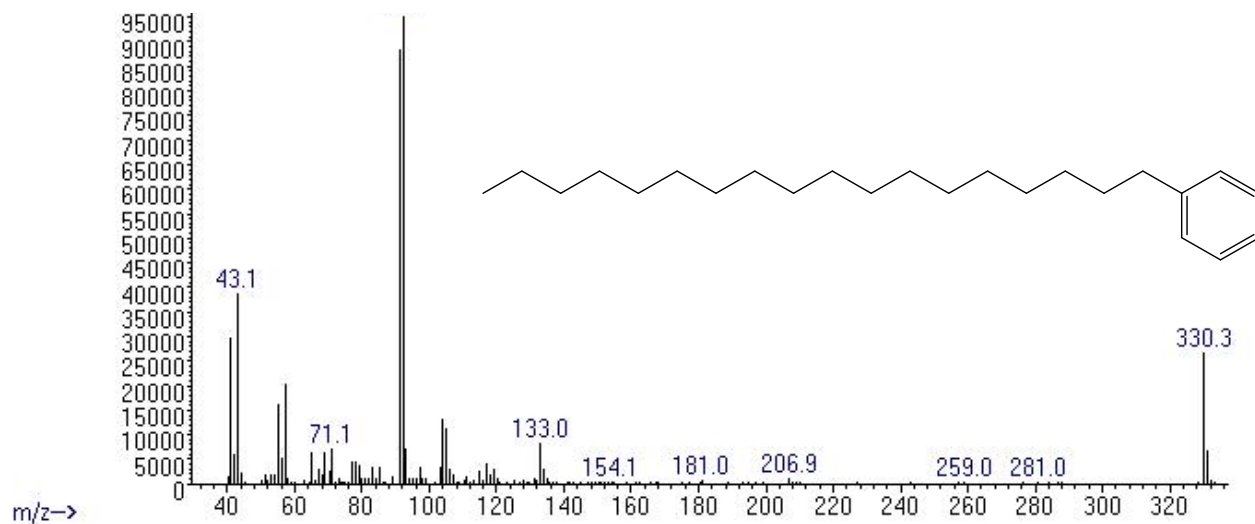

**Figure S35:** MS for 1-phenylhexadecane.

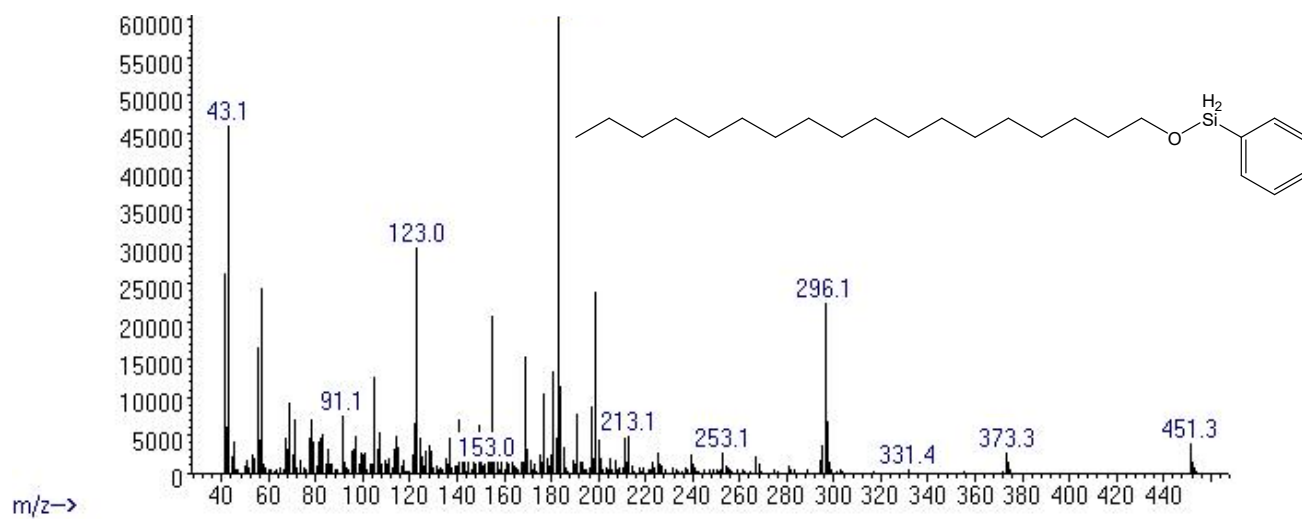

**Figure S36:** MS for 1-hexadecoxyphenylsilane.

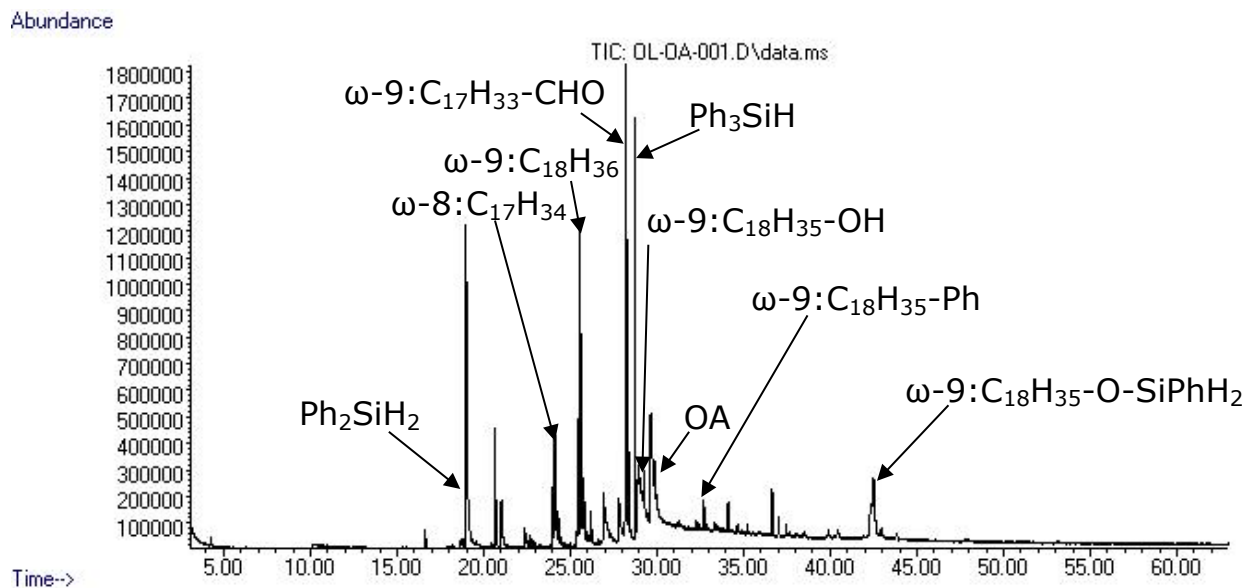

**Figure S37:** Chromatogram for crude reaction mix before hydrolysis of the reduction of OA with 3 eq.  $\text{PhSiH}_3$ , 5 mol% of a  $\text{Ni}(\text{AcO})_2 \cdot 4 \text{H}_2\text{O}$  as catalyst, neat conditions, at  $90^\circ\text{C}$  for 16 hours.

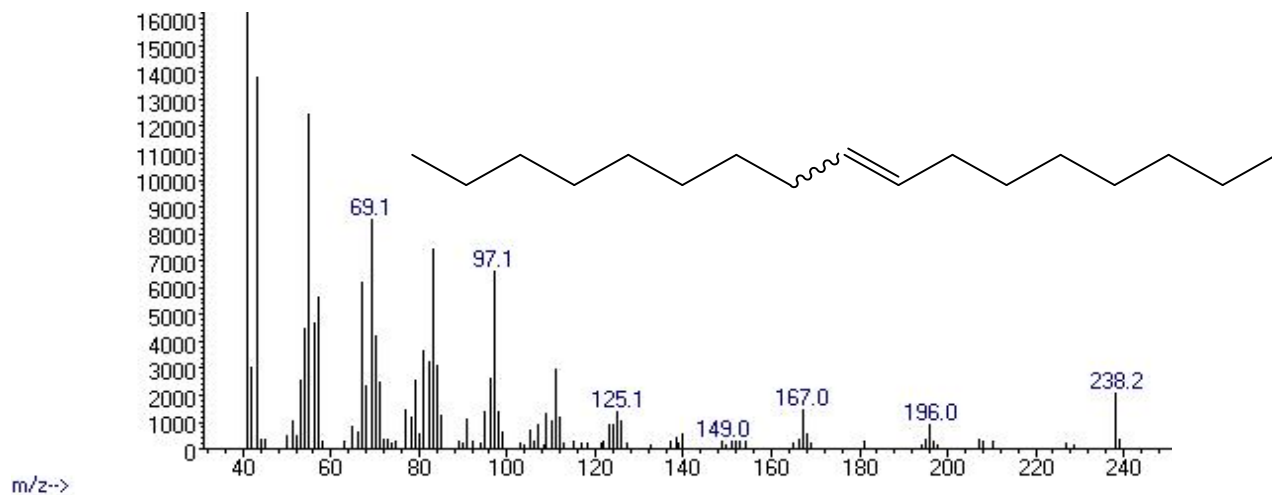

**Figure S38:** MS for (E/Z)-8-heptadecene.

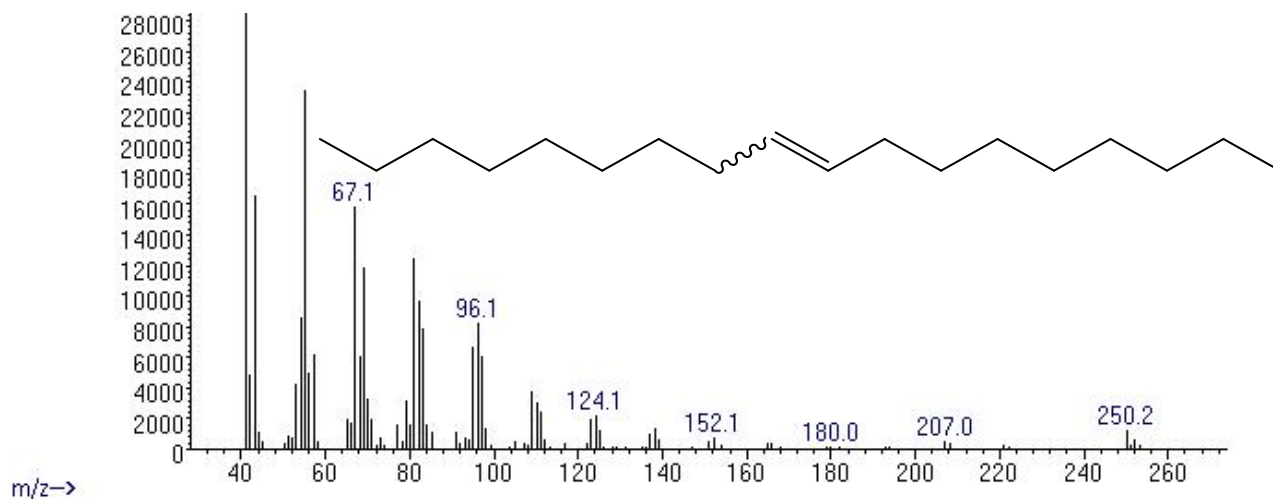

**Figure S39:** MS for (E/Z)-9-octadecene.

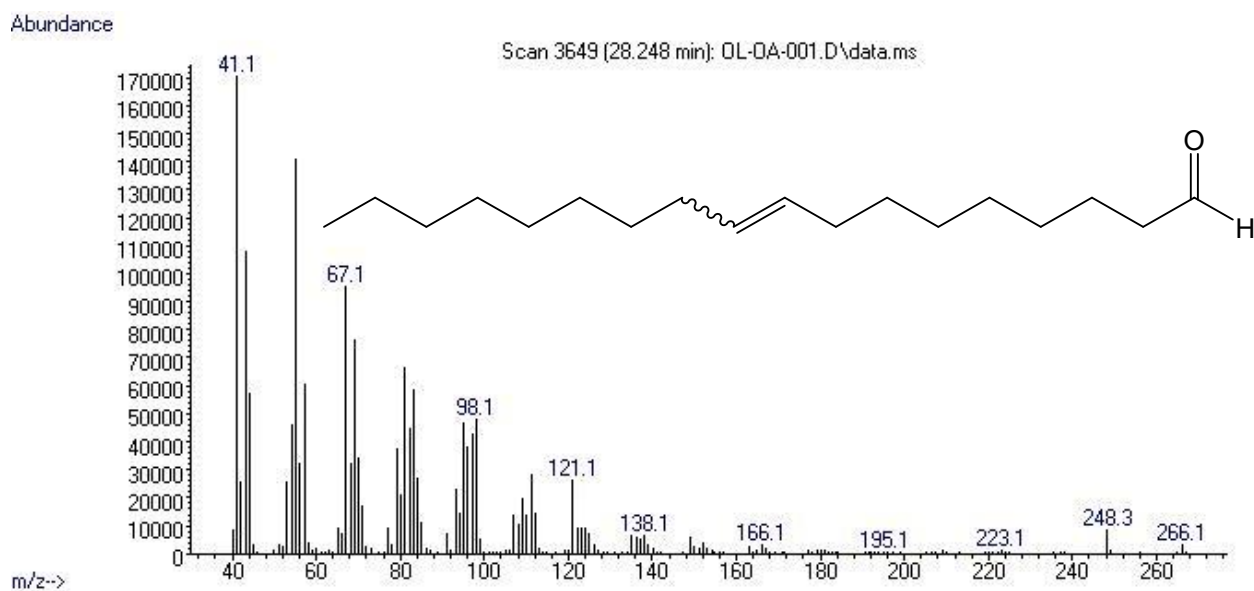

**Figure S40:** MS for (E/Z)-9-octadecenal.

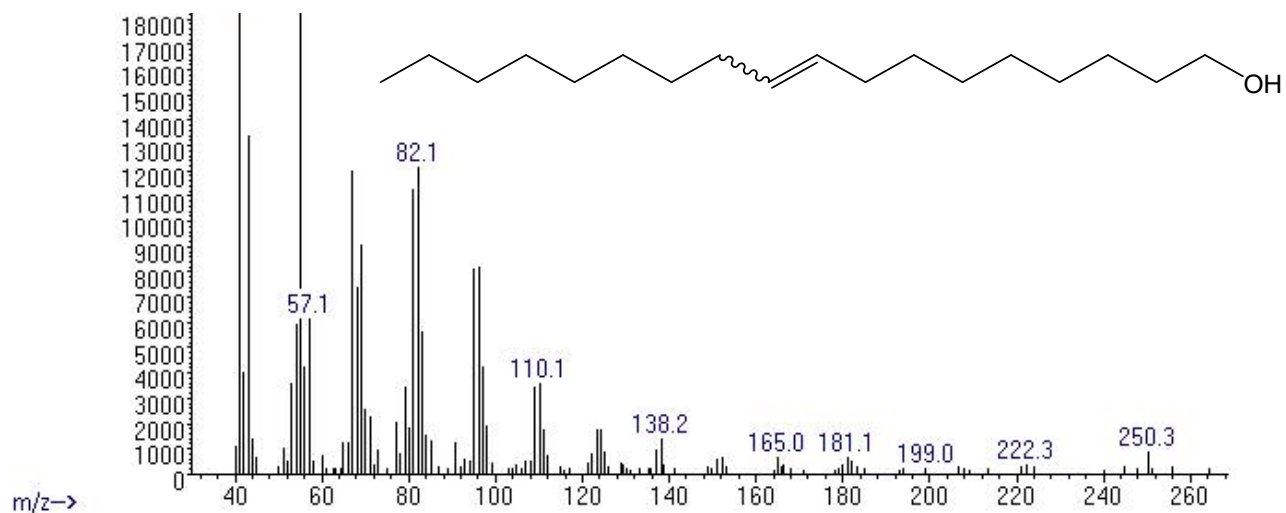

**Figure S41:** MS for (E/Z)-9-octadecen-1-ol.

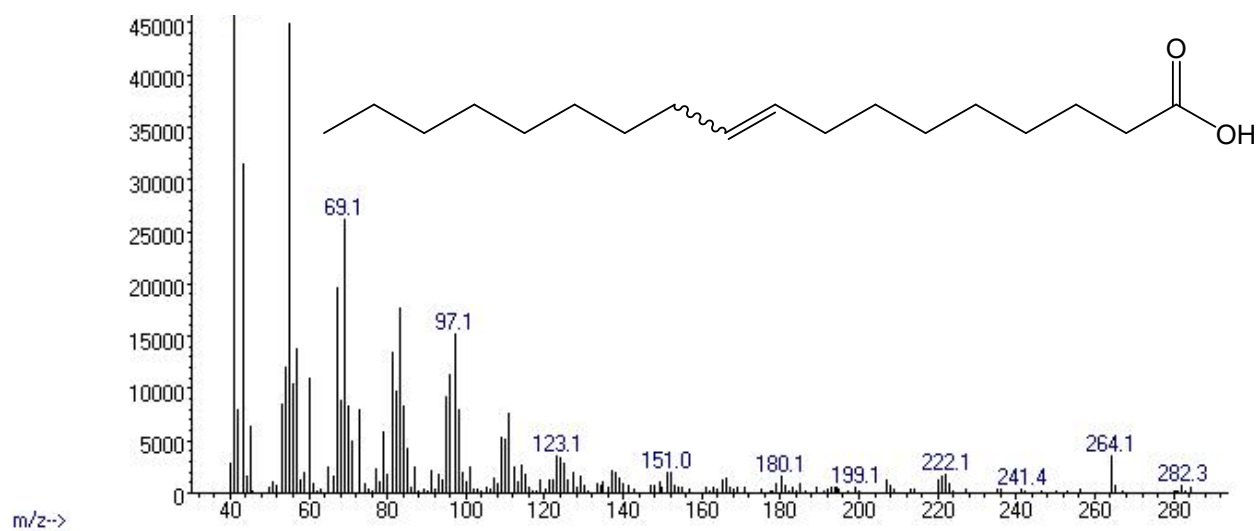

**Figure S42:** MS for (E/Z)-9-octadecenoic acid.

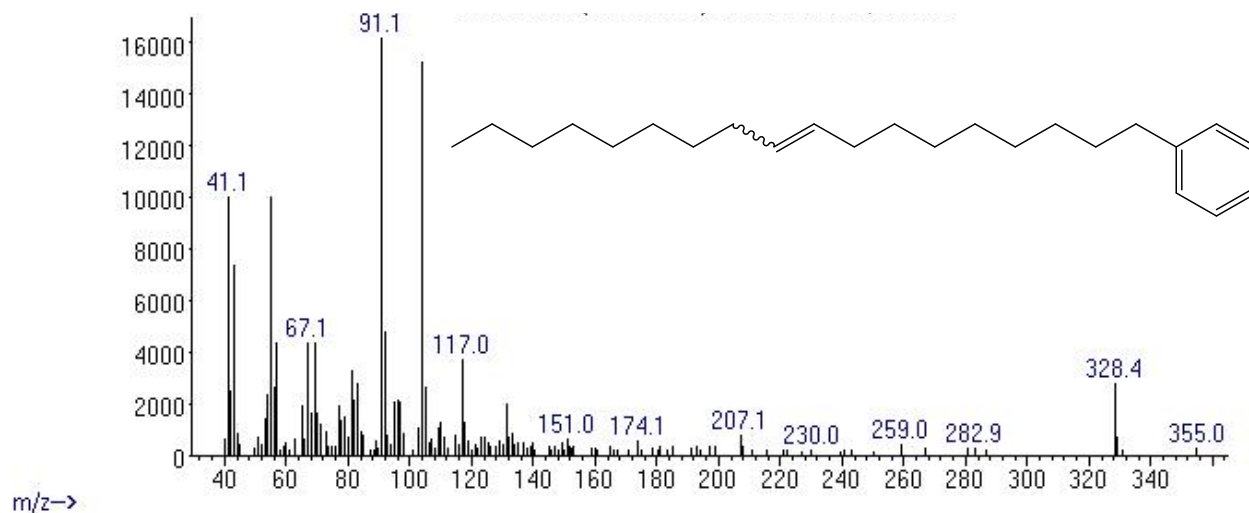

**Figure S43:** MS for 1-phenyl-(E/Z)-9-octadecene.

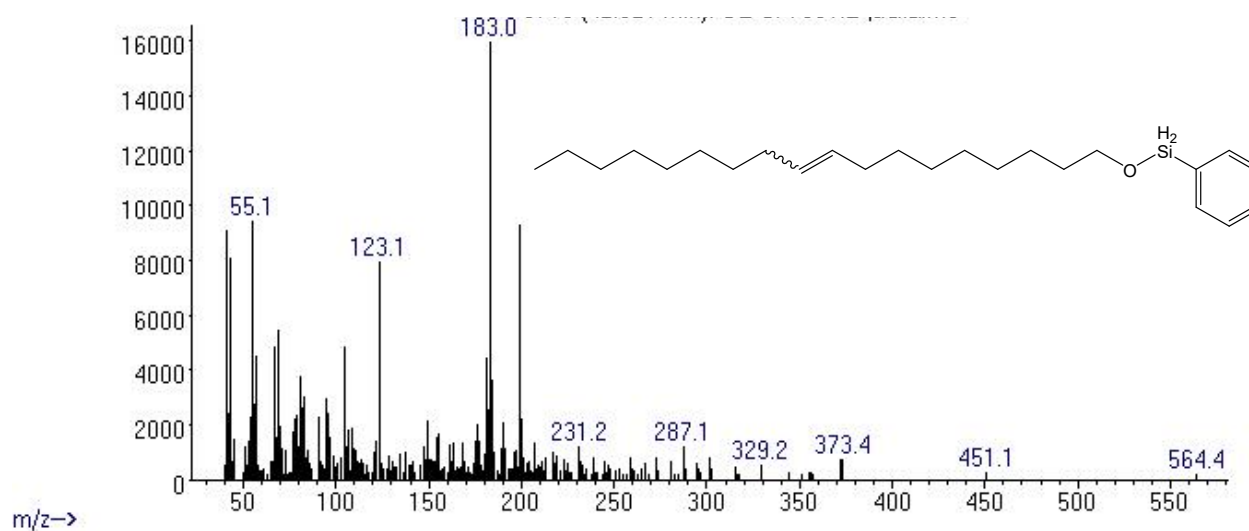

**Figure S44:** MS for (E/Z)-9-octadecenoxyphenylsilane.



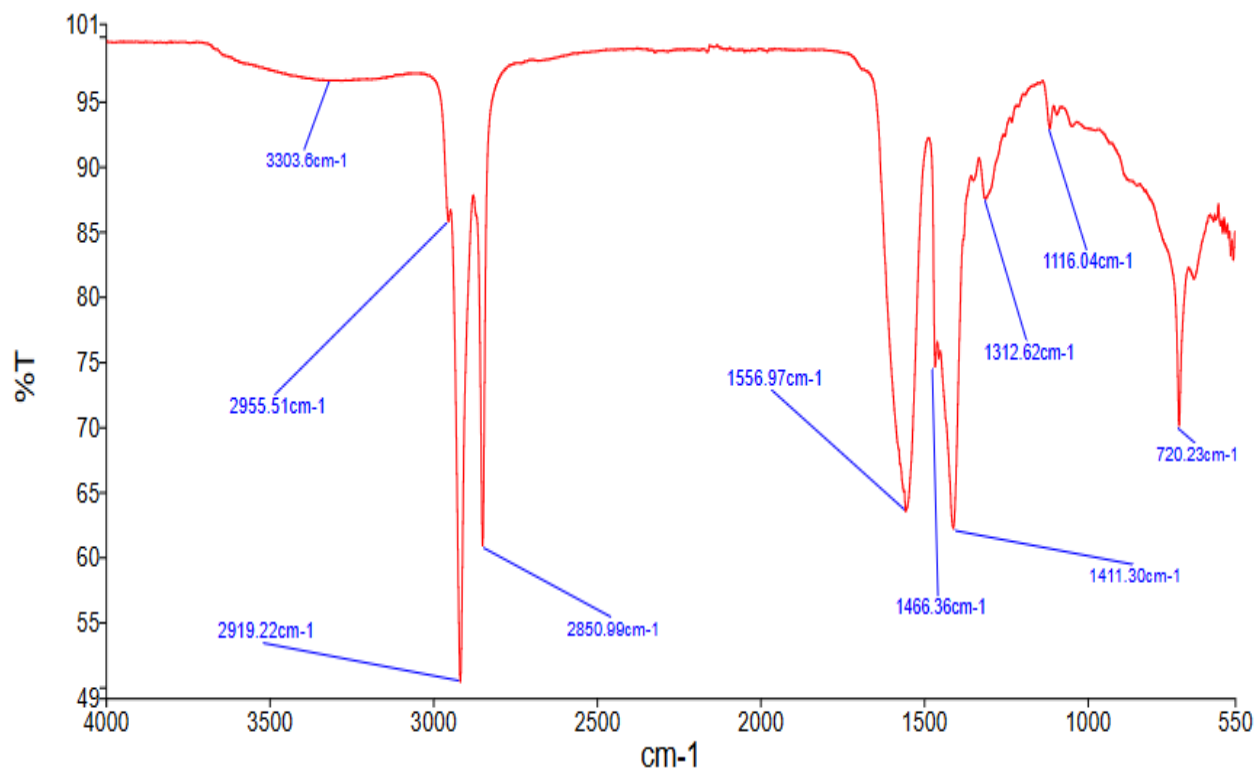

**Figure S45:** FTIR-ATR spectra of  $[\text{Ni}(\text{C}_{15}\text{H}_{31}\text{COO})_2(\text{H}_2\text{O})_2]$ .

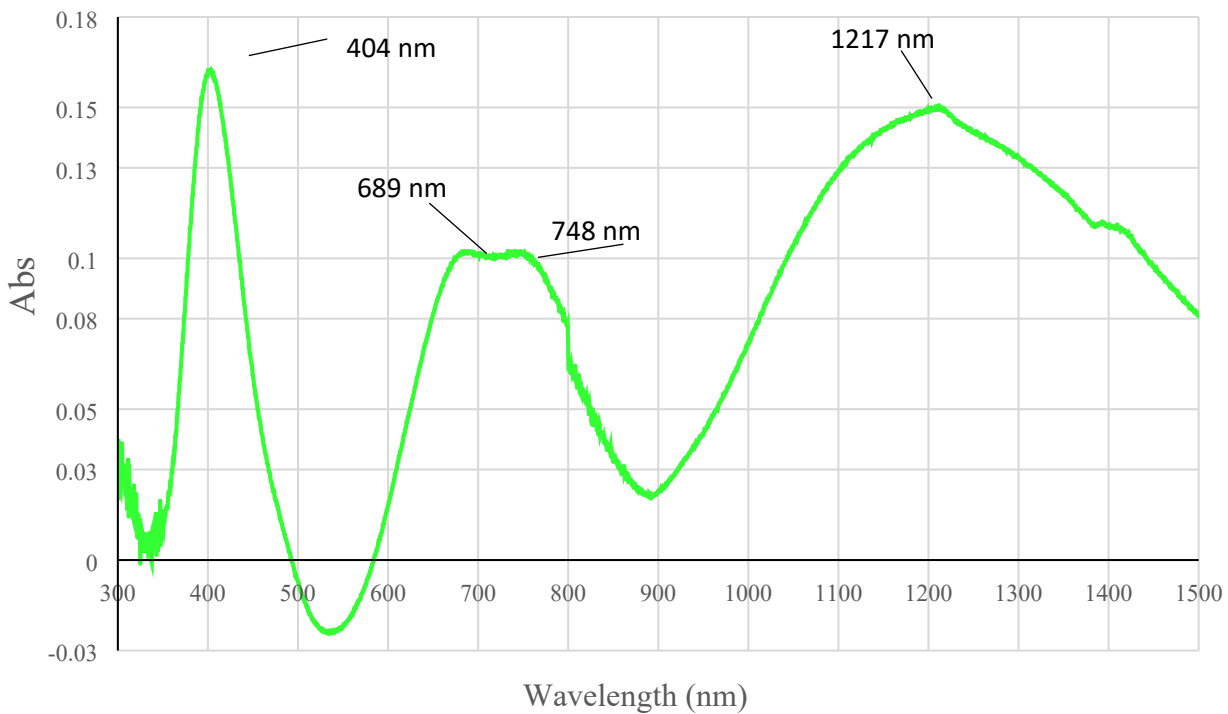

**Figure S46:** UV-Vis-NIR spectra of  $[\text{Ni}(\text{C}_{15}\text{H}_{31}\text{COO})_2(\text{H}_2\text{O})_2]$ .

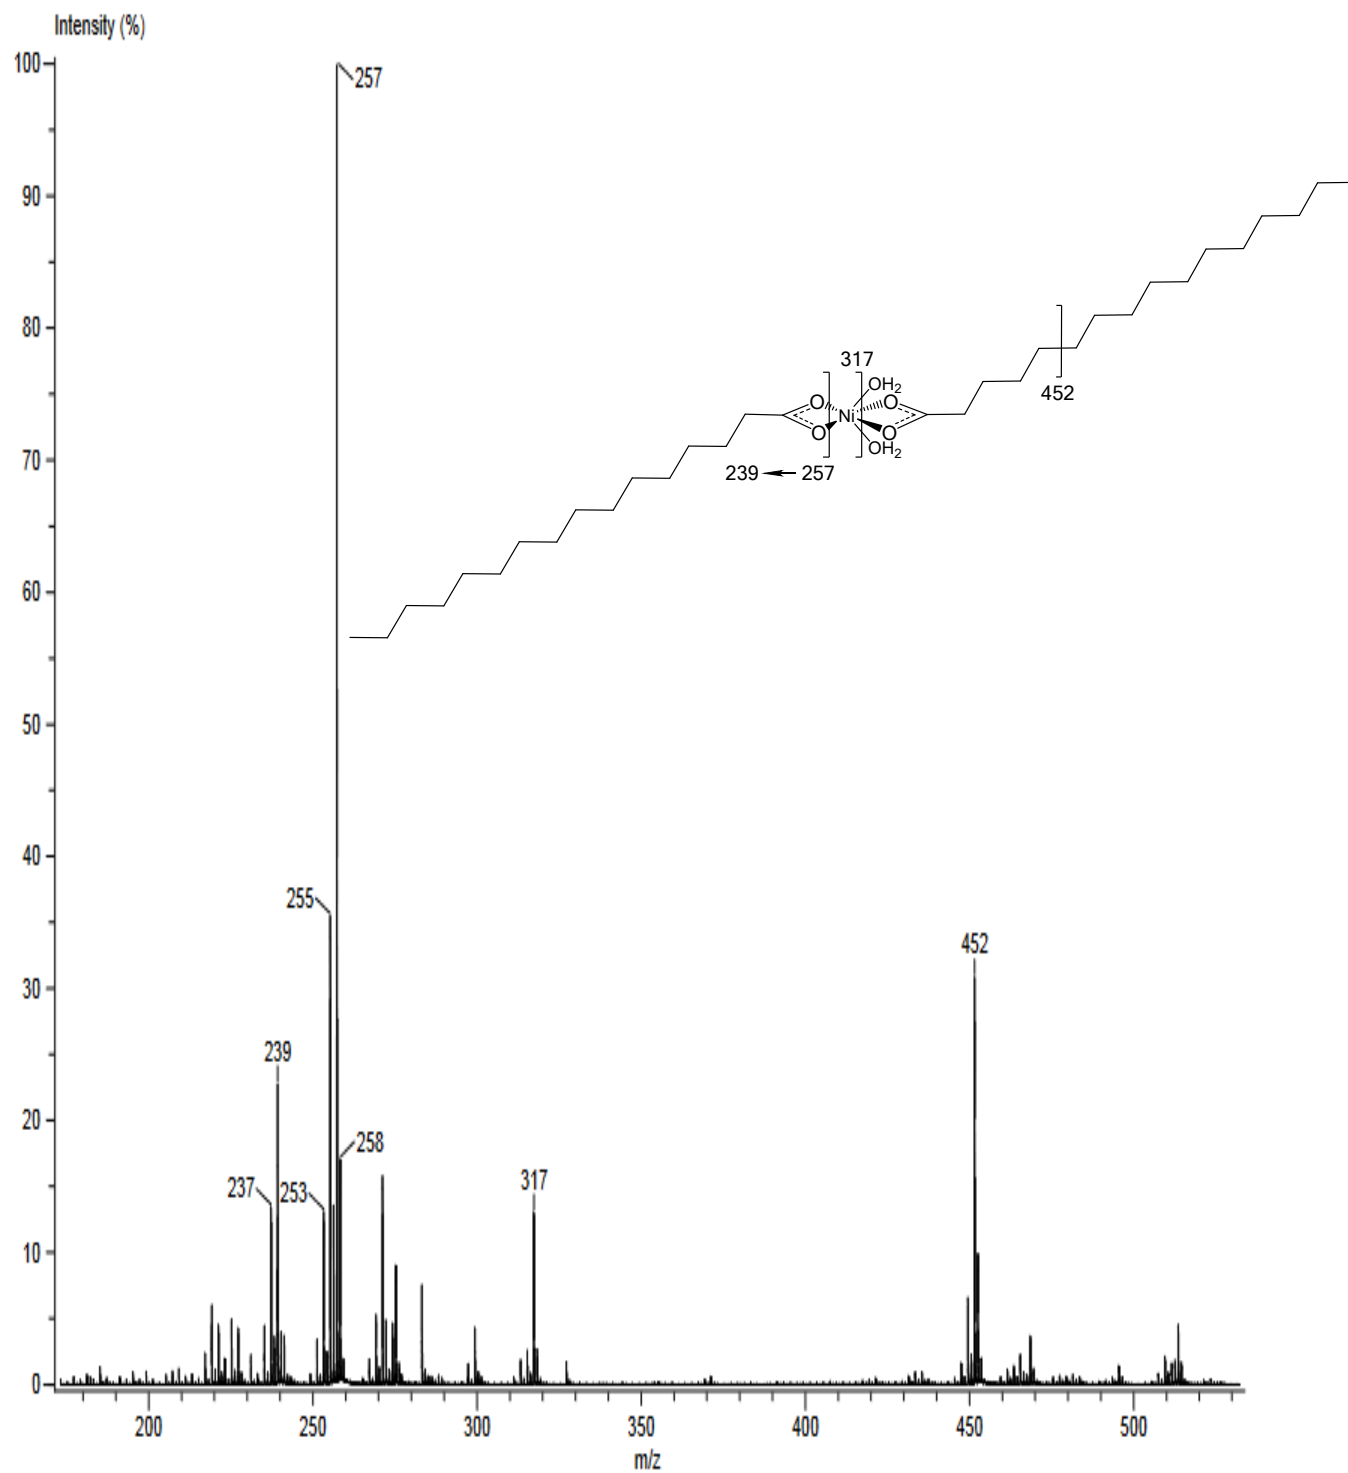

**Figure S47:** DART<sup>+</sup>-MS of the synthesized [Ni(C<sub>15</sub>H<sub>31</sub>COO)<sub>2</sub>(H<sub>2</sub>O)<sub>2</sub>].

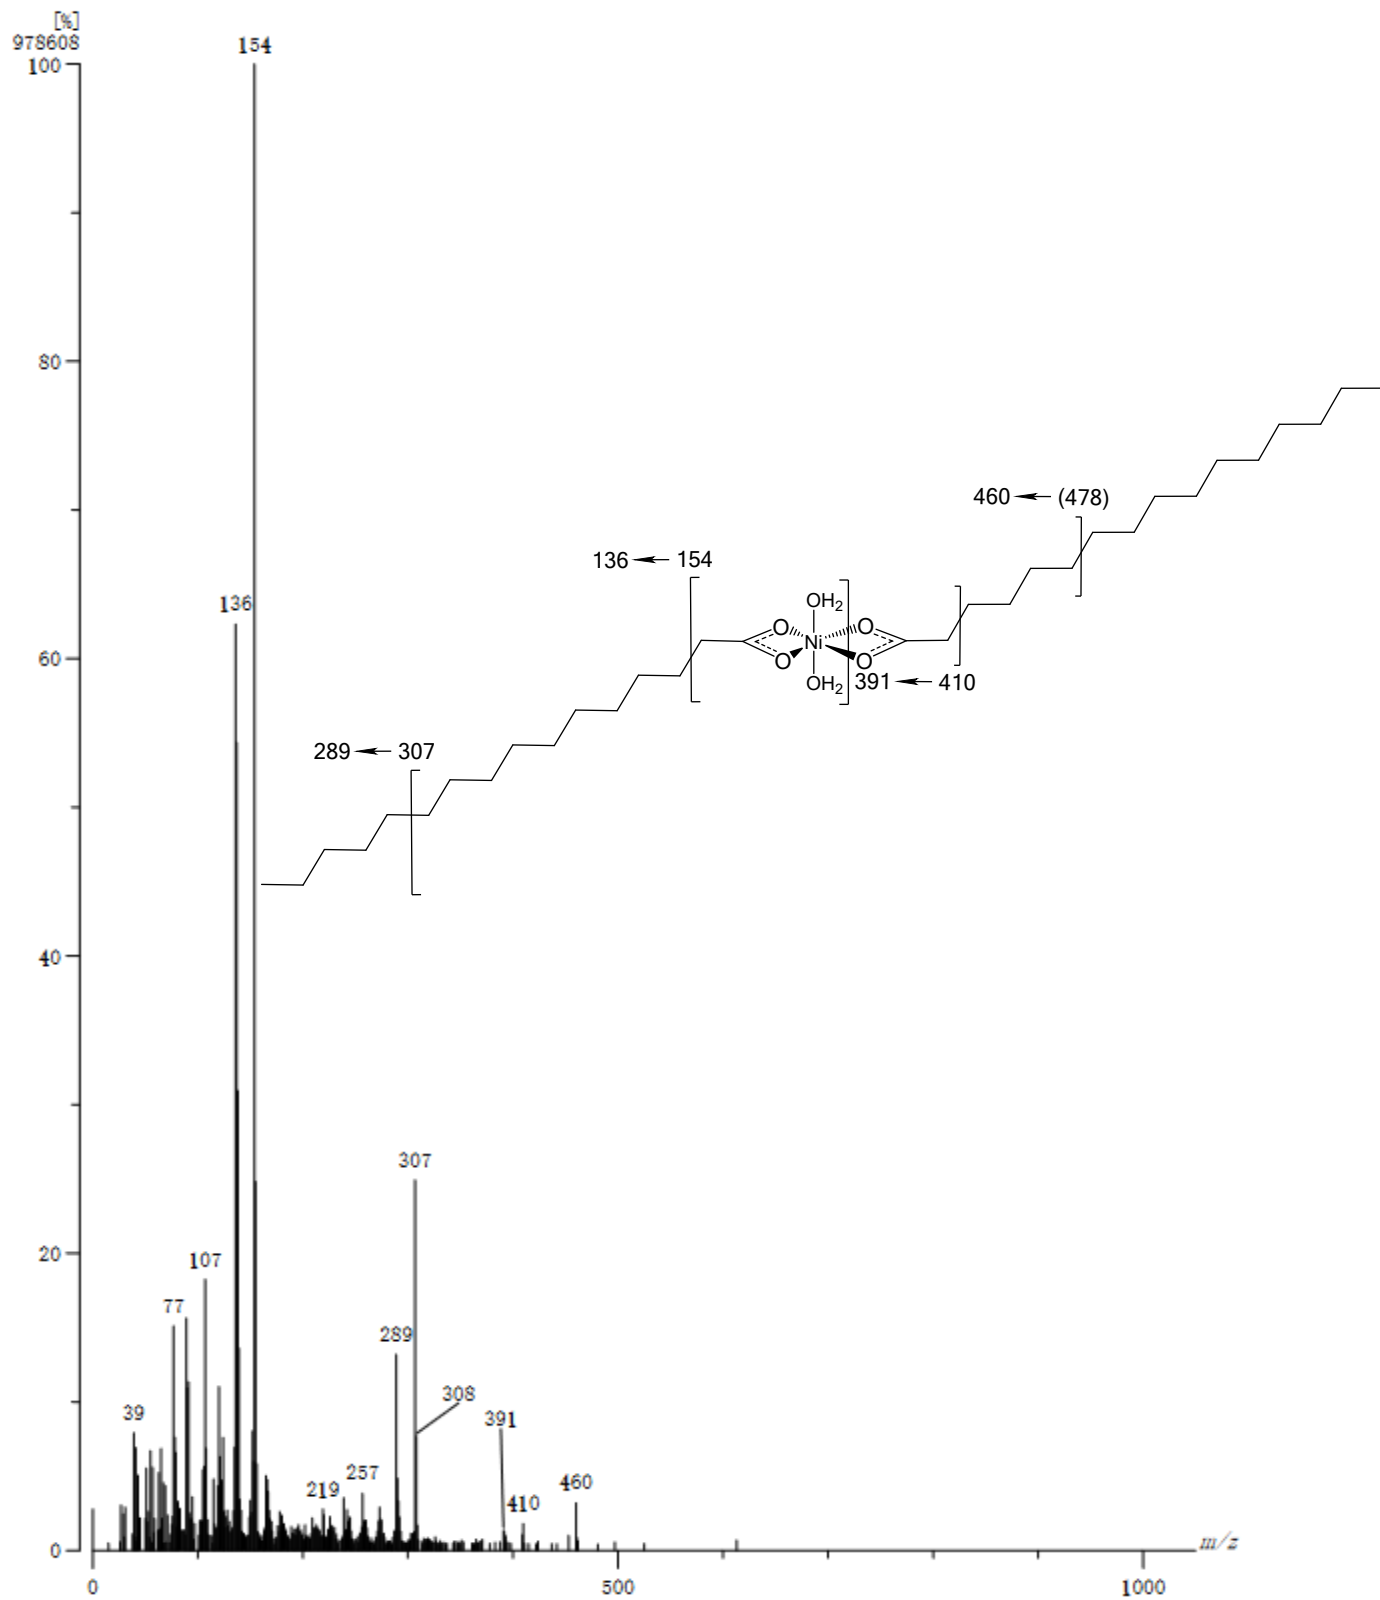

**Figure S48:** FAB<sup>+</sup>-MS for the synthesized  $[\text{Ni}(\text{C}_{15}\text{H}_{31}\text{COO})_2(\text{H}_2\text{O})_2]$ .
